# Supplementary material for: Evolution, heterogeneity and global dispersal of cosmopolitan genotype of Dengue virus type 2
Source: PubMed Central journal article supplement (PMC8241877; doi:10.1038/s41598-021-92783-y), 2021-06-29
Supplement: 41598_2021_92783_MOESM1_ESM.pdf [file 41598_2021_92783_MOESM1_ESM.pdf]

## **Evolution, heterogeneity and global dispersal of cosmopolitan genotype of Dengue virus type 2**

Surya Pavan Yenamandra<sup>1</sup>, Carmen Koo<sup>1</sup>, Suzanna Chiang<sup>1</sup>, Lim Han Shi Jeri<sup>2</sup>, Zhen Yuan Yeo<sup>3</sup>, Lee Ching Ng<sup>1,2</sup>, Hapuarachchige Chanditha Hapuarachchi<sup>1\*</sup>

\*Corresponding author

### **Supplementary Tables**

#### **Supplementary Table S1. Details of newly generated sequences from human cases and mosquitoes**

| NCBI accession number | Country   | Year | Lineage of cosmopolitan genotype | Origin   |
|-----------------------|-----------|------|----------------------------------|----------|
| MW510155              | Singapore | 2013 | Indian sub-continent lineage     | Mosquito |
| MW510957              | Singapore | 2012 | Indian sub-continent lineage     | Human    |
| MW510958              | Singapore | 2013 | Indian sub-continent lineage     | Human    |
| MW510959              | Singapore | 2013 | Indian sub-continent lineage     | Human    |
| MW510960              | Singapore | 2013 | Indian sub-continent lineage     | Human    |
| MW510961              | Singapore | 2013 | Indian sub-continent lineage     | Human    |
| MW510962              | Singapore | 2013 | Indian sub-continent lineage     | Human    |
| MW510963              | Singapore | 2013 | Indian sub-continent lineage     | Human    |
| MW510964              | Singapore | 2013 | Indian sub-continent lineage     | Human    |
| MW510965              | Singapore | 2013 | Indian sub-continent lineage     | Human    |
| MW510966              | Singapore | 2013 | Indian sub-continent lineage     | Human    |

|          |           |      |                              |       |
|----------|-----------|------|------------------------------|-------|
| MW510967 | Singapore | 2013 | Indian sub-continent lineage | Human |
| MW510968 | Singapore | 2013 | Indian sub-continent lineage | Human |
| MW510969 | Singapore | 2013 | Indian sub-continent lineage | Human |
| MW510970 | Singapore | 2013 | Indian sub-continent lineage | Human |
| MW510971 | Singapore | 2013 | Indian sub-continent lineage | Human |
| MW510972 | Singapore | 2014 | Indian sub-continent lineage | Human |
| MW510973 | Singapore | 2014 | Indian sub-continent lineage | Human |
| MW510974 | Singapore | 2014 | Indian sub-continent lineage | Human |
| MW510975 | Singapore | 2014 | Indian sub-continent lineage | Human |
| MW510976 | Singapore | 2014 | Indian sub-continent lineage | Human |
| MW510977 | Singapore | 2014 | Indian sub-continent lineage | Human |
| MW510978 | Singapore | 2014 | Indian sub-continent lineage | Human |
| MW510979 | Singapore | 2014 | Indian sub-continent lineage | Human |
| MW510980 | Singapore | 2014 | Indian sub-continent lineage | Human |
| MW510981 | Singapore | 2014 | Indian sub-continent lineage | Human |
| MW510982 | Singapore | 2014 | Indian sub-continent lineage | Human |
| MW510983 | Singapore | 2014 | Indian sub-continent lineage | Human |
| MW510984 | Singapore | 2014 | Indian sub-continent lineage | Human |
| MW510985 | Singapore | 2014 | Indian sub-continent lineage | Human |
| MW510986 | Singapore | 2015 | Indian sub-continent lineage | Human |
| MW510987 | Singapore | 2015 | Indian sub-continent lineage | Human |
| MW512362 | Singapore | 2011 | Indian sub-continent lineage | Human |
| MW512370 | Singapore | 2012 | Indian sub-continent lineage | Human |

|          |           |      |                              |          |
|----------|-----------|------|------------------------------|----------|
| MW512371 | Singapore | 2012 | Indian sub-continent lineage | Human    |
| MW512372 | Singapore | 2012 | Indian sub-continent lineage | Human    |
| MW512391 | Singapore | 2013 | Indian sub-continent lineage | Human    |
| MW512410 | Singapore | 2014 | Indian sub-continent lineage | Human    |
| MW512411 | Singapore | 2014 | Indian sub-continent lineage | Human    |
| MW512412 | Singapore | 2014 | Indian sub-continent lineage | Human    |
| MW512413 | Singapore | 2014 | Indian sub-continent lineage | Human    |
| MW512449 | Singapore | 2016 | Indian sub-continent lineage | Human    |
| MW512468 | Singapore | 2017 | Indian sub-continent lineage | Human    |
| MW512469 | Singapore | 2017 | Indian sub-continent lineage | Human    |
| MW512470 | Singapore | 2017 | Indian sub-continent lineage | Human    |
| MW512490 | Singapore | 2019 | Indian sub-continent lineage | Human    |
| MW510156 | Singapore | 2014 | Indian sub-continent lineage | Mosquito |
| MW510263 | Singapore | 2013 | Lineage1                     | Human    |
| MW510264 | Singapore | 2013 | Lineage1                     | Human    |
| MW510265 | Singapore | 2013 | Lineage1                     | Human    |
| MW510266 | Singapore | 2013 | Lineage1                     | Human    |
| MW510270 | Singapore | 2013 | Lineage1                     | Human    |
| MW512380 | Singapore | 2012 | Lineage1                     | Human    |
| MW512408 | Singapore | 2013 | Lineage1                     | Human    |
| MW512409 | Singapore | 2013 | Lineage1                     | Human    |
| MW512431 | Singapore | 2014 | Lineage1                     | Human    |
| MW512432 | Singapore | 2014 | Lineage1                     | Human    |

|          |           |      |          |          |
|----------|-----------|------|----------|----------|
| MW512433 | Singapore | 2014 | Lineage1 | Human    |
| MW512434 | Singapore | 2014 | Lineage1 | Human    |
| MW512467 | Singapore | 2016 | Lineage1 | Human    |
| MW512489 | Singapore | 2018 | Lineage1 | Human    |
| MW510024 | Singapore | 2012 | Lineage2 | Mosquito |
| MW510125 | Singapore | 2012 | Lineage2 | Mosquito |
| MW510126 | Singapore | 2012 | Lineage2 | Mosquito |
| MW510127 | Singapore | 2012 | Lineage2 | Mosquito |
| MW510128 | Singapore | 2012 | Lineage2 | Mosquito |
| MW510129 | Singapore | 2012 | Lineage2 | Mosquito |
| MW510130 | Singapore | 2012 | Lineage2 | Mosquito |
| MW510131 | Singapore | 2012 | Lineage2 | Mosquito |
| MW510132 | Singapore | 2012 | Lineage2 | Mosquito |
| MW510133 | Singapore | 2012 | Lineage2 | Mosquito |
| MW510134 | Singapore | 2012 | Lineage2 | Mosquito |
| MW510135 | Singapore | 2012 | Lineage2 | Mosquito |
| MW510136 | Singapore | 2012 | Lineage2 | Mosquito |
| MW510137 | Singapore | 2012 | Lineage2 | Mosquito |
| MW510138 | Singapore | 2012 | Lineage2 | Mosquito |
| MW510139 | Singapore | 2012 | Lineage2 | Mosquito |
| MW510140 | Singapore | 2012 | Lineage2 | Mosquito |
| MW510141 | Singapore | 2012 | Lineage2 | Mosquito |
| MW510142 | Singapore | 2012 | Lineage2 | Mosquito |

|          |           |      |          |          |
|----------|-----------|------|----------|----------|
| MW510143 | Singapore | 2012 | Lineage2 | Mosquito |
| MW510144 | Singapore | 2012 | Lineage2 | Mosquito |
| MW510145 | Singapore | 2012 | Lineage2 | Mosquito |
| MW510146 | Singapore | 2012 | Lineage2 | Mosquito |
| MW510147 | Singapore | 2012 | Lineage2 | Mosquito |
| MW510148 | Singapore | 2012 | Lineage2 | Mosquito |
| MW510149 | Singapore | 2012 | Lineage2 | Mosquito |
| MW510150 | Singapore | 2012 | Lineage2 | Mosquito |
| MW510151 | Singapore | 2013 | Lineage2 | Mosquito |
| MW510152 | Singapore | 2013 | Lineage2 | Mosquito |
| MW510238 | Singapore | 2008 | Lineage2 | Human    |
| MW510239 | Singapore | 2008 | Lineage2 | Human    |
| MW510240 | Singapore | 2008 | Lineage2 | Human    |
| MW510241 | Singapore | 2008 | Lineage2 | Human    |
| MW510242 | Singapore | 2010 | Lineage2 | Human    |
| MW510243 | Singapore | 2010 | Lineage2 | Human    |
| MW510245 | Singapore | 2011 | Lineage2 | Human    |
| MW510252 | Singapore | 2011 | Lineage2 | Human    |
| MW510256 | Singapore | 2012 | Lineage2 | Human    |
| MW510257 | Singapore | 2012 | Lineage2 | Human    |
| MW510267 | Singapore | 2013 | Lineage2 | Human    |
| MW510721 | Singapore | 2013 | Lineage2 | Human    |
| MW510722 | Singapore | 2013 | Lineage2 | Human    |

|          |           |      |          |       |
|----------|-----------|------|----------|-------|
| MW510723 | Singapore | 2013 | Lineage2 | Human |
| MW510724 | Singapore | 2013 | Lineage2 | Human |
| MW510725 | Singapore | 2013 | Lineage2 | Human |
| MW510726 | Singapore | 2013 | Lineage2 | Human |
| MW510727 | Singapore | 2013 | Lineage2 | Human |
| MW510728 | Singapore | 2013 | Lineage2 | Human |
| MW510729 | Singapore | 2013 | Lineage2 | Human |
| MW510730 | Singapore | 2013 | Lineage2 | Human |
| MW510731 | Singapore | 2013 | Lineage2 | Human |
| MW510732 | Singapore | 2013 | Lineage2 | Human |
| MW510733 | Singapore | 2013 | Lineage2 | Human |
| MW510734 | Singapore | 2013 | Lineage2 | Human |
| MW510735 | Singapore | 2013 | Lineage2 | Human |
| MW510736 | Singapore | 2013 | Lineage2 | Human |
| MW510737 | Singapore | 2013 | Lineage2 | Human |
| MW510738 | Singapore | 2013 | Lineage2 | Human |
| MW510739 | Singapore | 2013 | Lineage2 | Human |
| MW510740 | Singapore | 2013 | Lineage2 | Human |
| MW510741 | Singapore | 2013 | Lineage2 | Human |
| MW510742 | Singapore | 2011 | Lineage2 | Human |
| MW510743 | Singapore | 2011 | Lineage2 | Human |
| MW510744 | Singapore | 2011 | Lineage2 | Human |
| MW510745 | Singapore | 2011 | Lineage2 | Human |

|          |           |      |          |       |
|----------|-----------|------|----------|-------|
| MW510746 | Singapore | 2011 | Lineage2 | Human |
| MW510747 | Singapore | 2011 | Lineage2 | Human |
| MW510748 | Singapore | 2011 | Lineage2 | Human |
| MW510749 | Singapore | 2011 | Lineage2 | Human |
| MW510750 | Singapore | 2011 | Lineage2 | Human |
| MW510751 | Singapore | 2011 | Lineage2 | Human |
| MW510752 | Singapore | 2011 | Lineage2 | Human |
| MW510753 | Singapore | 2011 | Lineage2 | Human |
| MW510754 | Singapore | 2011 | Lineage2 | Human |
| MW510755 | Singapore | 2011 | Lineage2 | Human |
| MW510756 | Singapore | 2011 | Lineage2 | Human |
| MW510757 | Singapore | 2011 | Lineage2 | Human |
| MW510758 | Singapore | 2011 | Lineage2 | Human |
| MW510759 | Singapore | 2011 | Lineage2 | Human |
| MW510760 | Singapore | 2011 | Lineage2 | Human |
| MW510761 | Singapore | 2011 | Lineage2 | Human |
| MW510762 | Singapore | 2011 | Lineage2 | Human |
| MW510763 | Singapore | 2011 | Lineage2 | Human |
| MW510764 | Singapore | 2011 | Lineage2 | Human |
| MW510765 | Singapore | 2011 | Lineage2 | Human |
| MW510766 | Singapore | 2011 | Lineage2 | Human |
| MW510767 | Singapore | 2011 | Lineage2 | Human |
| MW510768 | Singapore | 2011 | Lineage2 | Human |

|          |           |      |          |       |
|----------|-----------|------|----------|-------|
| MW510769 | Singapore | 2011 | Lineage2 | Human |
| MW510770 | Singapore | 2011 | Lineage2 | Human |
| MW510771 | Singapore | 2011 | Lineage2 | Human |
| MW510772 | Singapore | 2011 | Lineage2 | Human |
| MW510773 | Singapore | 2011 | Lineage2 | Human |
| MW510774 | Singapore | 2011 | Lineage2 | Human |
| MW510775 | Singapore | 2011 | Lineage2 | Human |
| MW510776 | Singapore | 2011 | Lineage2 | Human |
| MW510777 | Singapore | 2011 | Lineage2 | Human |
| MW510778 | Singapore | 2011 | Lineage2 | Human |
| MW510779 | Singapore | 2011 | Lineage2 | Human |
| MW510780 | Singapore | 2012 | Lineage2 | Human |
| MW510781 | Singapore | 2012 | Lineage2 | Human |
| MW510782 | Singapore | 2012 | Lineage2 | Human |
| MW510783 | Singapore | 2012 | Lineage2 | Human |
| MW510784 | Singapore | 2012 | Lineage2 | Human |
| MW510785 | Singapore | 2012 | Lineage2 | Human |
| MW510786 | Singapore | 2012 | Lineage2 | Human |
| MW510787 | Singapore | 2012 | Lineage2 | Human |
| MW510788 | Singapore | 2012 | Lineage2 | Human |
| MW510789 | Singapore | 2012 | Lineage2 | Human |
| MW510790 | Singapore | 2012 | Lineage2 | Human |
| MW510791 | Singapore | 2012 | Lineage2 | Human |



|          |           |      |          |       |
|----------|-----------|------|----------|-------|
| MW510792 | Singapore | 2012 | Lineage2 | Human |
| MW510793 | Singapore | 2012 | Lineage2 | Human |
| MW510794 | Singapore | 2012 | Lineage2 | Human |
| MW510795 | Singapore | 2012 | Lineage2 | Human |
| MW510796 | Singapore | 2012 | Lineage2 | Human |
| MW510797 | Singapore | 2012 | Lineage2 | Human |
| MW510798 | Singapore | 2012 | Lineage2 | Human |
| MW510799 | Singapore | 2012 | Lineage2 | Human |
| MW510800 | Singapore | 2012 | Lineage2 | Human |
| MW510801 | Singapore | 2012 | Lineage2 | Human |
| MW510802 | Singapore | 2012 | Lineage2 | Human |
| MW510803 | Singapore | 2012 | Lineage2 | Human |
| MW510804 | Singapore | 2012 | Lineage2 | Human |
| MW510805 | Singapore | 2012 | Lineage2 | Human |
| MW510806 | Singapore | 2012 | Lineage2 | Human |
| MW510807 | Singapore | 2012 | Lineage2 | Human |
| MW510808 | Singapore | 2012 | Lineage2 | Human |
| MW510809 | Singapore | 2012 | Lineage2 | Human |
| MW510810 | Singapore | 2012 | Lineage2 | Human |
| MW510811 | Singapore | 2012 | Lineage2 | Human |
| MW510812 | Singapore | 2012 | Lineage2 | Human |
| MW510813 | Singapore | 2012 | Lineage2 | Human |
| MW510814 | Singapore | 2012 | Lineage2 | Human |

|          |           |      |          |       |
|----------|-----------|------|----------|-------|
| MW510815 | Singapore | 2012 | Lineage2 | Human |
| MW510816 | Singapore | 2012 | Lineage2 | Human |
| MW510817 | Singapore | 2012 | Lineage2 | Human |
| MW510818 | Singapore | 2012 | Lineage2 | Human |
| MW510819 | Singapore | 2012 | Lineage2 | Human |
| MW510820 | Singapore | 2012 | Lineage2 | Human |
| MW510821 | Singapore | 2012 | Lineage2 | Human |
| MW510822 | Singapore | 2012 | Lineage2 | Human |
| MW510823 | Singapore | 2012 | Lineage2 | Human |
| MW510824 | Singapore | 2013 | Lineage2 | Human |
| MW510825 | Singapore | 2013 | Lineage2 | Human |
| MW510826 | Singapore | 2013 | Lineage2 | Human |
| MW510827 | Singapore | 2013 | Lineage2 | Human |
| MW510828 | Singapore | 2013 | Lineage2 | Human |
| MW510829 | Singapore | 2013 | Lineage2 | Human |
| MW510830 | Singapore | 2013 | Lineage2 | Human |
| MW510831 | Singapore | 2013 | Lineage2 | Human |
| MW510832 | Singapore | 2013 | Lineage2 | Human |
| MW510833 | Singapore | 2013 | Lineage2 | Human |
| MW510834 | Singapore | 2013 | Lineage2 | Human |
| MW510835 | Singapore | 2013 | Lineage2 | Human |
| MW510836 | Singapore | 2013 | Lineage2 | Human |
| MW510837 | Singapore | 2015 | Lineage2 | Human |

|          |           |      |          |       |
|----------|-----------|------|----------|-------|
| MW512342 | Singapore | 2007 | Lineage2 | Human |
| MW512343 | Singapore | 2007 | Lineage2 | Human |
| MW512344 | Singapore | 2007 | Lineage2 | Human |
| MW512345 | Singapore | 2007 | Lineage2 | Human |
| MW512346 | Singapore | 2007 | Lineage2 | Human |
| MW512347 | Singapore | 2007 | Lineage2 | Human |
| MW512348 | Singapore | 2007 | Lineage2 | Human |
| MW512349 | Singapore | 2007 | Lineage2 | Human |
| MW512350 | Singapore | 2008 | Lineage2 | Human |
| MW512351 | Singapore | 2008 | Lineage2 | Human |
| MW512352 | Singapore | 2008 | Lineage2 | Human |
| MW512353 | Singapore | 2008 | Lineage2 | Human |
| MW512354 | Singapore | 2009 | Lineage2 | Human |
| MW512355 | Singapore | 2009 | Lineage2 | Human |
| MW512356 | Singapore | 2009 | Lineage2 | Human |
| MW512357 | Singapore | 2010 | Lineage2 | Human |
| MW512358 | Singapore | 2010 | Lineage2 | Human |
| MW512359 | Singapore | 2010 | Lineage2 | Human |
| MW512360 | Singapore | 2010 | Lineage2 | Human |
| MW512361 | Singapore | 2010 | Lineage2 | Human |
| MW512363 | Singapore | 2011 | Lineage2 | Human |
| MW512373 | Singapore | 2012 | Lineage2 | Human |
| MW512374 | Singapore | 2012 | Lineage2 | Human |

|          |           |      |          |          |
|----------|-----------|------|----------|----------|
| MW512381 | Singapore | 2013 | Lineage2 | Human    |
| MW512382 | Singapore | 2013 | Lineage2 | Human    |
| MW512383 | Singapore | 2013 | Lineage2 | Human    |
| MW512414 | Singapore | 2014 | Lineage2 | Human    |
| MW510052 | Singapore | 2018 | Lineage3 | Mosquito |
| MW510254 | Singapore | 2012 | Lineage3 | Human    |
| MW510259 | Singapore | 2012 | Lineage3 | Human    |
| MW510260 | Singapore | 2012 | Lineage3 | Human    |
| MW510261 | Singapore | 2012 | Lineage3 | Human    |
| MW510262 | Singapore | 2013 | Lineage3 | Human    |
| MW510269 | Singapore | 2013 | Lineage3 | Human    |
| MW510271 | Singapore | 2013 | Lineage3 | Human    |
| MW510272 | Singapore | 2013 | Lineage3 | Human    |
| MW510273 | Singapore | 2013 | Lineage3 | Human    |
| MW510277 | Singapore | 2015 | Lineage3 | Human    |
| MW510279 | Singapore | 2016 | Lineage3 | Human    |
| MW510280 | Singapore | 2016 | Lineage3 | Human    |
| MW510281 | Singapore | 2016 | Lineage3 | Human    |
| MW512364 | Singapore | 2011 | Lineage3 | Human    |
| MW512375 | Singapore | 2012 | Lineage3 | Human    |
| MW512376 | Singapore | 2012 | Lineage3 | Human    |
| MW512384 | Singapore | 2013 | Lineage3 | Human    |
| MW512385 | Singapore | 2013 | Lineage3 | Human    |

|          |           |      |          |          |
|----------|-----------|------|----------|----------|
| MW512386 | Singapore | 2013 | Lineage3 | Human    |
| MW512415 | Singapore | 2014 | Lineage3 | Human    |
| MW512450 | Singapore | 2016 | Lineage3 | Human    |
| MW512479 | Singapore | 2018 | Lineage3 | Human    |
| MW512480 | Singapore | 2018 | Lineage3 | Human    |
| MW510025 | Singapore | 2013 | Lineage4 | Mosquito |
| MW510026 | Singapore | 2013 | Lineage4 | Mosquito |
| MW510027 | Singapore | 2016 | Lineage4 | Mosquito |
| MW510153 | Singapore | 2014 | Lineage4 | Mosquito |
| MW510154 | Singapore | 2014 | Lineage4 | Mosquito |
| MW510255 | Singapore | 2012 | Lineage4 | Human    |
| MW510258 | Singapore | 2012 | Lineage4 | Human    |
| MW510274 | Singapore | 2013 | Lineage4 | Human    |
| MW510275 | Singapore | 2013 | Lineage4 | Human    |
| MW510838 | Singapore | 2013 | Lineage4 | Human    |
| MW510839 | Singapore | 2013 | Lineage4 | Human    |
| MW510840 | Singapore | 2013 | Lineage4 | Human    |
| MW510841 | Singapore | 2013 | Lineage4 | Human    |
| MW510842 | Singapore | 2013 | Lineage4 | Human    |
| MW510843 | Singapore | 2013 | Lineage4 | Human    |
| MW510844 | Singapore | 2013 | Lineage4 | Human    |
| MW510845 | Singapore | 2013 | Lineage4 | Human    |
| MW510846 | Singapore | 2013 | Lineage4 | Human    |

|          |           |      |          |       |
|----------|-----------|------|----------|-------|
| MW510847 | Singapore | 2013 | Lineage4 | Human |
| MW510848 | Singapore | 2013 | Lineage4 | Human |
| MW510849 | Singapore | 2013 | Lineage4 | Human |
| MW510850 | Singapore | 2013 | Lineage4 | Human |
| MW510851 | Singapore | 2013 | Lineage4 | Human |
| MW510852 | Singapore | 2013 | Lineage4 | Human |
| MW510853 | Singapore | 2013 | Lineage4 | Human |
| MW510854 | Singapore | 2013 | Lineage4 | Human |
| MW510855 | Singapore | 2013 | Lineage4 | Human |
| MW510856 | Singapore | 2013 | Lineage4 | Human |
| MW510857 | Singapore | 2013 | Lineage4 | Human |
| MW510858 | Singapore | 2013 | Lineage4 | Human |
| MW510859 | Singapore | 2013 | Lineage4 | Human |
| MW510860 | Singapore | 2013 | Lineage4 | Human |
| MW510861 | Singapore | 2012 | Lineage4 | Human |
| MW510862 | Singapore | 2012 | Lineage4 | Human |
| MW510863 | Singapore | 2012 | Lineage4 | Human |
| MW510864 | Singapore | 2012 | Lineage4 | Human |
| MW510865 | Singapore | 2012 | Lineage4 | Human |
| MW510866 | Singapore | 2012 | Lineage4 | Human |
| MW510867 | Singapore | 2012 | Lineage4 | Human |
| MW510868 | Singapore | 2012 | Lineage4 | Human |
| MW510869 | Singapore | 2012 | Lineage4 | Human |

|          |           |      |          |       |
|----------|-----------|------|----------|-------|
| MW510870 | Singapore | 2012 | Lineage4 | Human |
| MW510871 | Singapore | 2012 | Lineage4 | Human |
| MW510872 | Singapore | 2012 | Lineage4 | Human |
| MW510873 | Singapore | 2012 | Lineage4 | Human |
| MW510874 | Singapore | 2012 | Lineage4 | Human |
| MW510875 | Singapore | 2012 | Lineage4 | Human |
| MW510876 | Singapore | 2012 | Lineage4 | Human |
| MW510877 | Singapore | 2012 | Lineage4 | Human |
| MW510878 | Singapore | 2012 | Lineage4 | Human |
| MW510879 | Singapore | 2012 | Lineage4 | Human |
| MW510880 | Singapore | 2012 | Lineage4 | Human |
| MW510881 | Singapore | 2012 | Lineage4 | Human |
| MW510882 | Singapore | 2012 | Lineage4 | Human |
| MW510883 | Singapore | 2012 | Lineage4 | Human |
| MW510884 | Singapore | 2012 | Lineage4 | Human |
| MW510885 | Singapore | 2013 | Lineage4 | Human |
| MW510886 | Singapore | 2013 | Lineage4 | Human |
| MW510887 | Singapore | 2013 | Lineage4 | Human |
| MW510888 | Singapore | 2013 | Lineage4 | Human |
| MW510889 | Singapore | 2013 | Lineage4 | Human |
| MW510890 | Singapore | 2013 | Lineage4 | Human |
| MW510891 | Singapore | 2013 | Lineage4 | Human |
| MW510892 | Singapore | 2013 | Lineage4 | Human |

|          |           |      |          |       |
|----------|-----------|------|----------|-------|
| MW510893 | Singapore | 2013 | Lineage4 | Human |
| MW510894 | Singapore | 2013 | Lineage4 | Human |
| MW510895 | Singapore | 2013 | Lineage4 | Human |
| MW510896 | Singapore | 2013 | Lineage4 | Human |
| MW510897 | Singapore | 2013 | Lineage4 | Human |
| MW510898 | Singapore | 2013 | Lineage4 | Human |
| MW510899 | Singapore | 2013 | Lineage4 | Human |
| MW510900 | Singapore | 2013 | Lineage4 | Human |
| MW510901 | Singapore | 2013 | Lineage4 | Human |
| MW510902 | Singapore | 2013 | Lineage4 | Human |
| MW510903 | Singapore | 2013 | Lineage4 | Human |
| MW510904 | Singapore | 2013 | Lineage4 | Human |
| MW510905 | Singapore | 2013 | Lineage4 | Human |
| MW510906 | Singapore | 2013 | Lineage4 | Human |
| MW510907 | Singapore | 2013 | Lineage4 | Human |
| MW510908 | Singapore | 2013 | Lineage4 | Human |
| MW510909 | Singapore | 2013 | Lineage4 | Human |
| MW510910 | Singapore | 2013 | Lineage4 | Human |
| MW510911 | Singapore | 2013 | Lineage4 | Human |
| MW510912 | Singapore | 2013 | Lineage4 | Human |
| MW510913 | Singapore | 2013 | Lineage4 | Human |
| MW510914 | Singapore | 2013 | Lineage4 | Human |
| MW510915 | Singapore | 2013 | Lineage4 | Human |



|          |           |      |          |       |
|----------|-----------|------|----------|-------|
| MW510916 | Singapore | 2013 | Lineage4 | Human |
| MW510917 | Singapore | 2013 | Lineage4 | Human |
| MW510918 | Singapore | 2013 | Lineage4 | Human |
| MW510919 | Singapore | 2013 | Lineage4 | Human |
| MW510920 | Singapore | 2013 | Lineage4 | Human |
| MW510921 | Singapore | 2013 | Lineage4 | Human |
| MW510922 | Singapore | 2013 | Lineage4 | Human |
| MW510923 | Singapore | 2013 | Lineage4 | Human |
| MW510924 | Singapore | 2013 | Lineage4 | Human |
| MW510925 | Singapore | 2013 | Lineage4 | Human |
| MW510926 | Singapore | 2013 | Lineage4 | Human |
| MW510927 | Singapore | 2013 | Lineage4 | Human |
| MW510928 | Singapore | 2013 | Lineage4 | Human |
| MW510929 | Singapore | 2013 | Lineage4 | Human |
| MW510930 | Singapore | 2013 | Lineage4 | Human |
| MW510931 | Singapore | 2013 | Lineage4 | Human |
| MW510932 | Singapore | 2013 | Lineage4 | Human |
| MW510933 | Singapore | 2013 | Lineage4 | Human |
| MW510934 | Singapore | 2013 | Lineage4 | Human |
| MW510935 | Singapore | 2013 | Lineage4 | Human |
| MW510936 | Singapore | 2013 | Lineage4 | Human |
| MW510937 | Singapore | 2013 | Lineage4 | Human |
| MW510938 | Singapore | 2013 | Lineage4 | Human |

|          |           |      |          |       |
|----------|-----------|------|----------|-------|
| MW510939 | Singapore | 2013 | Lineage4 | Human |
| MW510940 | Singapore | 2013 | Lineage4 | Human |
| MW510941 | Singapore | 2013 | Lineage4 | Human |
| MW510942 | Singapore | 2013 | Lineage4 | Human |
| MW510943 | Singapore | 2013 | Lineage4 | Human |
| MW510944 | Singapore | 2013 | Lineage4 | Human |
| MW510945 | Singapore | 2013 | Lineage4 | Human |
| MW510946 | Singapore | 2013 | Lineage4 | Human |
| MW510947 | Singapore | 2013 | Lineage4 | Human |
| MW510948 | Singapore | 2013 | Lineage4 | Human |
| MW510949 | Singapore | 2013 | Lineage4 | Human |
| MW510950 | Singapore | 2013 | Lineage4 | Human |
| MW510951 | Singapore | 2013 | Lineage4 | Human |
| MW510952 | Singapore | 2014 | Lineage4 | Human |
| MW510953 | Singapore | 2014 | Lineage4 | Human |
| MW510954 | Singapore | 2014 | Lineage4 | Human |
| MW510955 | Singapore | 2014 | Lineage4 | Human |
| MW510956 | Singapore | 2014 | Lineage4 | Human |
| MW512369 | Singapore | 2011 | Lineage4 | Human |
| MW512377 | Singapore | 2012 | Lineage4 | Human |
| MW512378 | Singapore | 2012 | Lineage4 | Human |
| MW512379 | Singapore | 2012 | Lineage4 | Human |
| MW512404 | Singapore | 2013 | Lineage4 | Human |

|          |           |      |          |          |
|----------|-----------|------|----------|----------|
| MW512405 | Singapore | 2013 | Lineage4 | Human    |
| MW512406 | Singapore | 2013 | Lineage4 | Human    |
| MW512407 | Singapore | 2013 | Lineage4 | Human    |
| MW512428 | Singapore | 2014 | Lineage4 | Human    |
| MW512429 | Singapore | 2014 | Lineage4 | Human    |
| MW512430 | Singapore | 2014 | Lineage4 | Human    |
| MW512448 | Singapore | 2015 | Lineage4 | Human    |
| MW512464 | Singapore | 2016 | Lineage4 | Human    |
| MW512465 | Singapore | 2016 | Lineage4 | Human    |
| MW512466 | Singapore | 2016 | Lineage4 | Human    |
| MW510028 | Singapore | 2018 | Lineage5 | Mosquito |
| MW510029 | Singapore | 2018 | Lineage5 | Mosquito |
| MW510030 | Singapore | 2018 | Lineage5 | Mosquito |
| MW510031 | Singapore | 2018 | Lineage5 | Mosquito |
| MW510032 | Singapore | 2018 | Lineage5 | Mosquito |
| MW510033 | Singapore | 2018 | Lineage5 | Mosquito |
| MW510034 | Singapore | 2018 | Lineage5 | Mosquito |
| MW510035 | Singapore | 2018 | Lineage5 | Mosquito |
| MW510036 | Singapore | 2018 | Lineage5 | Mosquito |
| MW510039 | Singapore | 2018 | Lineage5 | Mosquito |
| MW510040 | Singapore | 2018 | Lineage5 | Mosquito |
| MW510041 | Singapore | 2018 | Lineage5 | Mosquito |
| MW510042 | Singapore | 2018 | Lineage5 | Mosquito |

|          |           |      |          |          |
|----------|-----------|------|----------|----------|
| MW510043 | Singapore | 2018 | Lineage5 | Mosquito |
| MW510044 | Singapore | 2018 | Lineage5 | Mosquito |
| MW510045 | Singapore | 2018 | Lineage5 | Mosquito |
| MW510046 | Singapore | 2018 | Lineage5 | Mosquito |
| MW510047 | Singapore | 2018 | Lineage5 | Mosquito |
| MW510048 | Singapore | 2018 | Lineage5 | Mosquito |
| MW510049 | Singapore | 2018 | Lineage5 | Mosquito |
| MW510050 | Singapore | 2018 | Lineage5 | Mosquito |
| MW510051 | Singapore | 2018 | Lineage5 | Mosquito |
| MW510053 | Singapore | 2018 | Lineage5 | Mosquito |
| MW510054 | Singapore | 2019 | Lineage5 | Mosquito |
| MW510055 | Singapore | 2019 | Lineage5 | Mosquito |
| MW510056 | Singapore | 2019 | Lineage5 | Mosquito |
| MW510057 | Singapore | 2019 | Lineage5 | Mosquito |
| MW510058 | Singapore | 2019 | Lineage5 | Mosquito |
| MW510059 | Singapore | 2019 | Lineage5 | Mosquito |
| MW510060 | Singapore | 2019 | Lineage5 | Mosquito |
| MW510061 | Singapore | 2019 | Lineage5 | Mosquito |
| MW510062 | Singapore | 2019 | Lineage5 | Mosquito |
| MW510063 | Singapore | 2019 | Lineage5 | Mosquito |
| MW510064 | Singapore | 2019 | Lineage5 | Mosquito |
| MW510065 | Singapore | 2019 | Lineage5 | Mosquito |
| MW510066 | Singapore | 2019 | Lineage5 | Mosquito |

|          |           |      |          |          |
|----------|-----------|------|----------|----------|
| MW510067 | Singapore | 2019 | Lineage5 | Mosquito |
| MW510068 | Singapore | 2019 | Lineage5 | Mosquito |
| MW510069 | Singapore | 2019 | Lineage5 | Mosquito |
| MW510070 | Singapore | 2019 | Lineage5 | Mosquito |
| MW510071 | Singapore | 2019 | Lineage5 | Mosquito |
| MW510072 | Singapore | 2019 | Lineage5 | Mosquito |
| MW510073 | Singapore | 2019 | Lineage5 | Mosquito |
| MW510074 | Singapore | 2019 | Lineage5 | Mosquito |
| MW510075 | Singapore | 2019 | Lineage5 | Mosquito |
| MW510076 | Singapore | 2019 | Lineage5 | Mosquito |
| MW510077 | Singapore | 2019 | Lineage5 | Mosquito |
| MW510078 | Singapore | 2019 | Lineage5 | Mosquito |
| MW510079 | Singapore | 2019 | Lineage5 | Mosquito |
| MW510080 | Singapore | 2019 | Lineage5 | Mosquito |
| MW510081 | Singapore | 2014 | Lineage5 | Mosquito |
| MW510082 | Singapore | 2015 | Lineage5 | Mosquito |
| MW510083 | Singapore | 2015 | Lineage5 | Mosquito |
| MW510084 | Singapore | 2015 | Lineage5 | Mosquito |
| MW510085 | Singapore | 2015 | Lineage5 | Mosquito |
| MW510086 | Singapore | 2015 | Lineage5 | Mosquito |
| MW510087 | Singapore | 2015 | Lineage5 | Mosquito |
| MW510088 | Singapore | 2015 | Lineage5 | Mosquito |
| MW510089 | Singapore | 2015 | Lineage5 | Mosquito |

|          |           |      |          |          |
|----------|-----------|------|----------|----------|
| MW510090 | Singapore | 2015 | Lineage5 | Mosquito |
| MW510091 | Singapore | 2015 | Lineage5 | Mosquito |
| MW510092 | Singapore | 2015 | Lineage5 | Mosquito |
| MW510093 | Singapore | 2015 | Lineage5 | Mosquito |
| MW510094 | Singapore | 2015 | Lineage5 | Mosquito |
| MW510095 | Singapore | 2015 | Lineage5 | Mosquito |
| MW510096 | Singapore | 2015 | Lineage5 | Mosquito |
| MW510097 | Singapore | 2016 | Lineage5 | Mosquito |
| MW510098 | Singapore | 2016 | Lineage5 | Mosquito |
| MW510099 | Singapore | 2016 | Lineage5 | Mosquito |
| MW510100 | Singapore | 2016 | Lineage5 | Mosquito |
| MW510101 | Singapore | 2016 | Lineage5 | Mosquito |
| MW510102 | Singapore | 2016 | Lineage5 | Mosquito |
| MW510103 | Singapore | 2016 | Lineage5 | Mosquito |
| MW510104 | Singapore | 2016 | Lineage5 | Mosquito |
| MW510105 | Singapore | 2016 | Lineage5 | Mosquito |
| MW510106 | Singapore | 2016 | Lineage5 | Mosquito |
| MW510107 | Singapore | 2016 | Lineage5 | Mosquito |
| MW510108 | Singapore | 2016 | Lineage5 | Mosquito |
| MW510109 | Singapore | 2016 | Lineage5 | Mosquito |
| MW510110 | Singapore | 2016 | Lineage5 | Mosquito |
| MW510111 | Singapore | 2016 | Lineage5 | Mosquito |
| MW510112 | Singapore | 2016 | Lineage5 | Mosquito |

|          |           |      |          |          |
|----------|-----------|------|----------|----------|
| MW510113 | Singapore | 2016 | Lineage5 | Mosquito |
| MW510114 | Singapore | 2016 | Lineage5 | Mosquito |
| MW510115 | Singapore | 2016 | Lineage5 | Mosquito |
| MW510116 | Singapore | 2016 | Lineage5 | Mosquito |
| MW510119 | Singapore | 2017 | Lineage5 | Mosquito |
| MW510121 | Singapore | 2016 | Lineage5 | Mosquito |
| MW510122 | Singapore | 2016 | Lineage5 | Mosquito |
| MW510123 | Singapore | 2016 | Lineage5 | Mosquito |
| MW510124 | Singapore | 2016 | Lineage5 | Mosquito |
| MW510244 | Singapore | 2011 | Lineage5 | Human    |
| MW510246 | Singapore | 2011 | Lineage5 | Human    |
| MW510247 | Singapore | 2011 | Lineage5 | Human    |
| MW510248 | Singapore | 2011 | Lineage5 | Human    |
| MW510249 | Singapore | 2011 | Lineage5 | Human    |
| MW510250 | Singapore | 2011 | Lineage5 | Human    |
| MW510251 | Singapore | 2011 | Lineage5 | Human    |
| MW510253 | Singapore | 2011 | Lineage5 | Human    |
| MW510268 | Singapore | 2013 | Lineage5 | Human    |
| MW510276 | Singapore | 2014 | Lineage5 | Human    |
| MW510278 | Singapore | 2015 | Lineage5 | Human    |
| MW510282 | Singapore | 2018 | Lineage5 | Human    |
| MW510283 | Singapore | 2018 | Lineage5 | Human    |
| MW510284 | Singapore | 2018 | Lineage5 | Human    |

|          |           |      |          |       |
|----------|-----------|------|----------|-------|
| MW510285 | Singapore | 2018 | Lineage5 | Human |
| MW510286 | Singapore | 2018 | Lineage5 | Human |
| MW510287 | Singapore | 2018 | Lineage5 | Human |
| MW510288 | Singapore | 2018 | Lineage5 | Human |
| MW510289 | Singapore | 2018 | Lineage5 | Human |
| MW510290 | Singapore | 2018 | Lineage5 | Human |
| MW510291 | Singapore | 2018 | Lineage5 | Human |
| MW510292 | Singapore | 2018 | Lineage5 | Human |
| MW510293 | Singapore | 2018 | Lineage5 | Human |
| MW510294 | Singapore | 2018 | Lineage5 | Human |
| MW510295 | Singapore | 2018 | Lineage5 | Human |
| MW510296 | Singapore | 2018 | Lineage5 | Human |
| MW510297 | Singapore | 2018 | Lineage5 | Human |
| MW510298 | Singapore | 2018 | Lineage5 | Human |
| MW510299 | Singapore | 2018 | Lineage5 | Human |
| MW510300 | Singapore | 2018 | Lineage5 | Human |
| MW510301 | Singapore | 2018 | Lineage5 | Human |
| MW510302 | Singapore | 2018 | Lineage5 | Human |
| MW510303 | Singapore | 2018 | Lineage5 | Human |
| MW510304 | Singapore | 2018 | Lineage5 | Human |
| MW510305 | Singapore | 2018 | Lineage5 | Human |
| MW510306 | Singapore | 2019 | Lineage5 | Human |
| MW510307 | Singapore | 2019 | Lineage5 | Human |



|          |           |      |          |       |
|----------|-----------|------|----------|-------|
| MW510308 | Singapore | 2019 | Lineage5 | Human |
| MW510309 | Singapore | 2019 | Lineage5 | Human |
| MW510310 | Singapore | 2019 | Lineage5 | Human |
| MW510311 | Singapore | 2019 | Lineage5 | Human |
| MW510312 | Singapore | 2019 | Lineage5 | Human |
| MW510313 | Singapore | 2019 | Lineage5 | Human |
| MW510314 | Singapore | 2019 | Lineage5 | Human |
| MW510315 | Singapore | 2019 | Lineage5 | Human |
| MW510316 | Singapore | 2019 | Lineage5 | Human |
| MW510317 | Singapore | 2019 | Lineage5 | Human |
| MW510318 | Singapore | 2019 | Lineage5 | Human |
| MW510319 | Singapore | 2019 | Lineage5 | Human |
| MW510320 | Singapore | 2019 | Lineage5 | Human |
| MW510321 | Singapore | 2019 | Lineage5 | Human |
| MW510322 | Singapore | 2019 | Lineage5 | Human |
| MW510323 | Singapore | 2019 | Lineage5 | Human |
| MW510324 | Singapore | 2019 | Lineage5 | Human |
| MW510325 | Singapore | 2019 | Lineage5 | Human |
| MW510326 | Singapore | 2019 | Lineage5 | Human |
| MW510327 | Singapore | 2019 | Lineage5 | Human |
| MW510328 | Singapore | 2019 | Lineage5 | Human |
| MW510329 | Singapore | 2019 | Lineage5 | Human |
| MW510330 | Singapore | 2019 | Lineage5 | Human |

|          |           |      |          |       |
|----------|-----------|------|----------|-------|
| MW510331 | Singapore | 2019 | Lineage5 | Human |
| MW510332 | Singapore | 2019 | Lineage5 | Human |
| MW510333 | Singapore | 2019 | Lineage5 | Human |
| MW510334 | Singapore | 2019 | Lineage5 | Human |
| MW510335 | Singapore | 2019 | Lineage5 | Human |
| MW510336 | Singapore | 2019 | Lineage5 | Human |
| MW510337 | Singapore | 2019 | Lineage5 | Human |
| MW510338 | Singapore | 2019 | Lineage5 | Human |
| MW510339 | Singapore | 2019 | Lineage5 | Human |
| MW510340 | Singapore | 2019 | Lineage5 | Human |
| MW510341 | Singapore | 2019 | Lineage5 | Human |
| MW510342 | Singapore | 2019 | Lineage5 | Human |
| MW510343 | Singapore | 2019 | Lineage5 | Human |
| MW510344 | Singapore | 2013 | Lineage5 | Human |
| MW510345 | Singapore | 2013 | Lineage5 | Human |
| MW510346 | Singapore | 2013 | Lineage5 | Human |
| MW510347 | Singapore | 2013 | Lineage5 | Human |
| MW510348 | Singapore | 2013 | Lineage5 | Human |
| MW510349 | Singapore | 2013 | Lineage5 | Human |
| MW510350 | Singapore | 2013 | Lineage5 | Human |
| MW510351 | Singapore | 2013 | Lineage5 | Human |
| MW510352 | Singapore | 2014 | Lineage5 | Human |
| MW510353 | Singapore | 2014 | Lineage5 | Human |

|          |           |      |          |       |
|----------|-----------|------|----------|-------|
| MW510354 | Singapore | 2014 | Lineage5 | Human |
| MW510355 | Singapore | 2014 | Lineage5 | Human |
| MW510356 | Singapore | 2014 | Lineage5 | Human |
| MW510357 | Singapore | 2014 | Lineage5 | Human |
| MW510358 | Singapore | 2014 | Lineage5 | Human |
| MW510359 | Singapore | 2014 | Lineage5 | Human |
| MW510360 | Singapore | 2014 | Lineage5 | Human |
| MW510361 | Singapore | 2014 | Lineage5 | Human |
| MW510362 | Singapore | 2014 | Lineage5 | Human |
| MW510363 | Singapore | 2014 | Lineage5 | Human |
| MW510364 | Singapore | 2014 | Lineage5 | Human |
| MW510365 | Singapore | 2014 | Lineage5 | Human |
| MW510366 | Singapore | 2014 | Lineage5 | Human |
| MW510367 | Singapore | 2014 | Lineage5 | Human |
| MW510368 | Singapore | 2014 | Lineage5 | Human |
| MW510369 | Singapore | 2014 | Lineage5 | Human |
| MW510370 | Singapore | 2014 | Lineage5 | Human |
| MW510371 | Singapore | 2014 | Lineage5 | Human |
| MW510372 | Singapore | 2014 | Lineage5 | Human |
| MW510373 | Singapore | 2014 | Lineage5 | Human |
| MW510374 | Singapore | 2014 | Lineage5 | Human |
| MW510375 | Singapore | 2014 | Lineage5 | Human |
| MW510376 | Singapore | 2014 | Lineage5 | Human |

|          |           |      |          |       |
|----------|-----------|------|----------|-------|
| MW510377 | Singapore | 2014 | Lineage5 | Human |
| MW510378 | Singapore | 2014 | Lineage5 | Human |
| MW510379 | Singapore | 2014 | Lineage5 | Human |
| MW510380 | Singapore | 2014 | Lineage5 | Human |
| MW510381 | Singapore | 2014 | Lineage5 | Human |
| MW510382 | Singapore | 2014 | Lineage5 | Human |
| MW510383 | Singapore | 2014 | Lineage5 | Human |
| MW510384 | Singapore | 2014 | Lineage5 | Human |
| MW510385 | Singapore | 2014 | Lineage5 | Human |
| MW510386 | Singapore | 2014 | Lineage5 | Human |
| MW510387 | Singapore | 2014 | Lineage5 | Human |
| MW510388 | Singapore | 2014 | Lineage5 | Human |
| MW510389 | Singapore | 2014 | Lineage5 | Human |
| MW510390 | Singapore | 2014 | Lineage5 | Human |
| MW510391 | Singapore | 2014 | Lineage5 | Human |
| MW510392 | Singapore | 2014 | Lineage5 | Human |
| MW510393 | Singapore | 2014 | Lineage5 | Human |
| MW510394 | Singapore | 2014 | Lineage5 | Human |
| MW510395 | Singapore | 2014 | Lineage5 | Human |
| MW510396 | Singapore | 2014 | Lineage5 | Human |
| MW510397 | Singapore | 2014 | Lineage5 | Human |
| MW510398 | Singapore | 2014 | Lineage5 | Human |
| MW510399 | Singapore | 2014 | Lineage5 | Human |

|          |           |      |          |       |
|----------|-----------|------|----------|-------|
| MW510400 | Singapore | 2014 | Lineage5 | Human |
| MW510401 | Singapore | 2014 | Lineage5 | Human |
| MW510402 | Singapore | 2014 | Lineage5 | Human |
| MW510403 | Singapore | 2014 | Lineage5 | Human |
| MW510404 | Singapore | 2014 | Lineage5 | Human |
| MW510405 | Singapore | 2014 | Lineage5 | Human |
| MW510406 | Singapore | 2014 | Lineage5 | Human |
| MW510407 | Singapore | 2014 | Lineage5 | Human |
| MW510408 | Singapore | 2014 | Lineage5 | Human |
| MW510409 | Singapore | 2014 | Lineage5 | Human |
| MW510410 | Singapore | 2014 | Lineage5 | Human |
| MW510411 | Singapore | 2014 | Lineage5 | Human |
| MW510412 | Singapore | 2014 | Lineage5 | Human |
| MW510413 | Singapore | 2014 | Lineage5 | Human |
| MW510414 | Singapore | 2014 | Lineage5 | Human |
| MW510415 | Singapore | 2014 | Lineage5 | Human |
| MW510416 | Singapore | 2014 | Lineage5 | Human |
| MW510417 | Singapore | 2014 | Lineage5 | Human |
| MW510418 | Singapore | 2014 | Lineage5 | Human |
| MW510419 | Singapore | 2014 | Lineage5 | Human |
| MW510420 | Singapore | 2014 | Lineage5 | Human |
| MW510421 | Singapore | 2014 | Lineage5 | Human |
| MW510422 | Singapore | 2014 | Lineage5 | Human |

|          |           |      |          |       |
|----------|-----------|------|----------|-------|
| MW510423 | Singapore | 2014 | Lineage5 | Human |
| MW510424 | Singapore | 2014 | Lineage5 | Human |
| MW510425 | Singapore | 2014 | Lineage5 | Human |
| MW510426 | Singapore | 2014 | Lineage5 | Human |
| MW510427 | Singapore | 2014 | Lineage5 | Human |
| MW510428 | Singapore | 2014 | Lineage5 | Human |
| MW510429 | Singapore | 2014 | Lineage5 | Human |
| MW510430 | Singapore | 2014 | Lineage5 | Human |
| MW510431 | Singapore | 2014 | Lineage5 | Human |
| MW510432 | Singapore | 2014 | Lineage5 | Human |
| MW510433 | Singapore | 2014 | Lineage5 | Human |
| MW510434 | Singapore | 2014 | Lineage5 | Human |
| MW510435 | Singapore | 2014 | Lineage5 | Human |
| MW510436 | Singapore | 2014 | Lineage5 | Human |
| MW510437 | Singapore | 2014 | Lineage5 | Human |
| MW510438 | Singapore | 2014 | Lineage5 | Human |
| MW510439 | Singapore | 2015 | Lineage5 | Human |
| MW510440 | Singapore | 2015 | Lineage5 | Human |
| MW510441 | Singapore | 2015 | Lineage5 | Human |
| MW510442 | Singapore | 2015 | Lineage5 | Human |
| MW510443 | Singapore | 2015 | Lineage5 | Human |
| MW510444 | Singapore | 2015 | Lineage5 | Human |
| MW510445 | Singapore | 2015 | Lineage5 | Human |

|          |           |      |          |       |
|----------|-----------|------|----------|-------|
| MW510446 | Singapore | 2015 | Lineage5 | Human |
| MW510447 | Singapore | 2015 | Lineage5 | Human |
| MW510448 | Singapore | 2015 | Lineage5 | Human |
| MW510449 | Singapore | 2015 | Lineage5 | Human |
| MW510450 | Singapore | 2015 | Lineage5 | Human |
| MW510451 | Singapore | 2015 | Lineage5 | Human |
| MW510452 | Singapore | 2015 | Lineage5 | Human |
| MW510453 | Singapore | 2015 | Lineage5 | Human |
| MW510454 | Singapore | 2015 | Lineage5 | Human |
| MW510455 | Singapore | 2015 | Lineage5 | Human |
| MW510456 | Singapore | 2015 | Lineage5 | Human |
| MW510457 | Singapore | 2015 | Lineage5 | Human |
| MW510458 | Singapore | 2015 | Lineage5 | Human |
| MW510459 | Singapore | 2015 | Lineage5 | Human |
| MW510460 | Singapore | 2015 | Lineage5 | Human |
| MW510461 | Singapore | 2015 | Lineage5 | Human |
| MW510462 | Singapore | 2015 | Lineage5 | Human |
| MW510463 | Singapore | 2015 | Lineage5 | Human |
| MW510464 | Singapore | 2015 | Lineage5 | Human |
| MW510465 | Singapore | 2015 | Lineage5 | Human |
| MW510466 | Singapore | 2015 | Lineage5 | Human |
| MW510467 | Singapore | 2015 | Lineage5 | Human |
| MW510468 | Singapore | 2015 | Lineage5 | Human |

|          |           |      |          |       |
|----------|-----------|------|----------|-------|
| MW510469 | Singapore | 2015 | Lineage5 | Human |
| MW510470 | Singapore | 2015 | Lineage5 | Human |
| MW510471 | Singapore | 2015 | Lineage5 | Human |
| MW510472 | Singapore | 2015 | Lineage5 | Human |
| MW510473 | Singapore | 2015 | Lineage5 | Human |
| MW510474 | Singapore | 2015 | Lineage5 | Human |
| MW510475 | Singapore | 2015 | Lineage5 | Human |
| MW510476 | Singapore | 2015 | Lineage5 | Human |
| MW510477 | Singapore | 2015 | Lineage5 | Human |
| MW510478 | Singapore | 2015 | Lineage5 | Human |
| MW510479 | Singapore | 2015 | Lineage5 | Human |
| MW510480 | Singapore | 2015 | Lineage5 | Human |
| MW510481 | Singapore | 2015 | Lineage5 | Human |
| MW510482 | Singapore | 2015 | Lineage5 | Human |
| MW510483 | Singapore | 2015 | Lineage5 | Human |
| MW510484 | Singapore | 2015 | Lineage5 | Human |
| MW510485 | Singapore | 2015 | Lineage5 | Human |
| MW510486 | Singapore | 2015 | Lineage5 | Human |
| MW510487 | Singapore | 2015 | Lineage5 | Human |
| MW510488 | Singapore | 2015 | Lineage5 | Human |
| MW510489 | Singapore | 2015 | Lineage5 | Human |
| MW510490 | Singapore | 2015 | Lineage5 | Human |
| MW510491 | Singapore | 2015 | Lineage5 | Human |



|          |           |      |          |       |
|----------|-----------|------|----------|-------|
| MW510492 | Singapore | 2015 | Lineage5 | Human |
| MW510493 | Singapore | 2015 | Lineage5 | Human |
| MW510494 | Singapore | 2015 | Lineage5 | Human |
| MW510495 | Singapore | 2015 | Lineage5 | Human |
| MW510496 | Singapore | 2015 | Lineage5 | Human |
| MW510497 | Singapore | 2015 | Lineage5 | Human |
| MW510498 | Singapore | 2015 | Lineage5 | Human |
| MW510499 | Singapore | 2015 | Lineage5 | Human |
| MW510500 | Singapore | 2015 | Lineage5 | Human |
| MW510501 | Singapore | 2015 | Lineage5 | Human |
| MW510502 | Singapore | 2015 | Lineage5 | Human |
| MW510503 | Singapore | 2015 | Lineage5 | Human |
| MW510504 | Singapore | 2015 | Lineage5 | Human |
| MW510505 | Singapore | 2015 | Lineage5 | Human |
| MW510506 | Singapore | 2015 | Lineage5 | Human |
| MW510507 | Singapore | 2015 | Lineage5 | Human |
| MW510508 | Singapore | 2015 | Lineage5 | Human |
| MW510509 | Singapore | 2015 | Lineage5 | Human |
| MW510510 | Singapore | 2015 | Lineage5 | Human |
| MW510511 | Singapore | 2015 | Lineage5 | Human |
| MW510512 | Singapore | 2015 | Lineage5 | Human |
| MW510513 | Singapore | 2015 | Lineage5 | Human |
| MW510514 | Singapore | 2015 | Lineage5 | Human |

|          |           |      |          |       |
|----------|-----------|------|----------|-------|
| MW510515 | Singapore | 2015 | Lineage5 | Human |
| MW510516 | Singapore | 2015 | Lineage5 | Human |
| MW510517 | Singapore | 2015 | Lineage5 | Human |
| MW510518 | Singapore | 2015 | Lineage5 | Human |
| MW510519 | Singapore | 2015 | Lineage5 | Human |
| MW510520 | Singapore | 2015 | Lineage5 | Human |
| MW510521 | Singapore | 2015 | Lineage5 | Human |
| MW510522 | Singapore | 2015 | Lineage5 | Human |
| MW510523 | Singapore | 2015 | Lineage5 | Human |
| MW510524 | Singapore | 2015 | Lineage5 | Human |
| MW510525 | Singapore | 2015 | Lineage5 | Human |
| MW510526 | Singapore | 2015 | Lineage5 | Human |
| MW510527 | Singapore | 2015 | Lineage5 | Human |
| MW510528 | Singapore | 2015 | Lineage5 | Human |
| MW510529 | Singapore | 2015 | Lineage5 | Human |
| MW510530 | Singapore | 2015 | Lineage5 | Human |
| MW510531 | Singapore | 2015 | Lineage5 | Human |
| MW510532 | Singapore | 2015 | Lineage5 | Human |
| MW510533 | Singapore | 2015 | Lineage5 | Human |
| MW510534 | Singapore | 2015 | Lineage5 | Human |
| MW510535 | Singapore | 2015 | Lineage5 | Human |
| MW510536 | Singapore | 2015 | Lineage5 | Human |
| MW510537 | Singapore | 2015 | Lineage5 | Human |

|          |           |      |          |       |
|----------|-----------|------|----------|-------|
| MW510538 | Singapore | 2016 | Lineage5 | Human |
| MW510539 | Singapore | 2016 | Lineage5 | Human |
| MW510540 | Singapore | 2016 | Lineage5 | Human |
| MW510541 | Singapore | 2016 | Lineage5 | Human |
| MW510542 | Singapore | 2016 | Lineage5 | Human |
| MW510543 | Singapore | 2016 | Lineage5 | Human |
| MW510544 | Singapore | 2016 | Lineage5 | Human |
| MW510545 | Singapore | 2016 | Lineage5 | Human |
| MW510546 | Singapore | 2016 | Lineage5 | Human |
| MW510547 | Singapore | 2016 | Lineage5 | Human |
| MW510548 | Singapore | 2016 | Lineage5 | Human |
| MW510549 | Singapore | 2016 | Lineage5 | Human |
| MW510550 | Singapore | 2016 | Lineage5 | Human |
| MW510551 | Singapore | 2016 | Lineage5 | Human |
| MW510552 | Singapore | 2016 | Lineage5 | Human |
| MW510553 | Singapore | 2016 | Lineage5 | Human |
| MW510554 | Singapore | 2016 | Lineage5 | Human |
| MW510555 | Singapore | 2016 | Lineage5 | Human |
| MW510556 | Singapore | 2016 | Lineage5 | Human |
| MW510557 | Singapore | 2016 | Lineage5 | Human |
| MW510558 | Singapore | 2016 | Lineage5 | Human |
| MW510559 | Singapore | 2016 | Lineage5 | Human |
| MW510560 | Singapore | 2016 | Lineage5 | Human |

|          |           |      |          |       |
|----------|-----------|------|----------|-------|
| MW510561 | Singapore | 2016 | Lineage5 | Human |
| MW510562 | Singapore | 2016 | Lineage5 | Human |
| MW510563 | Singapore | 2016 | Lineage5 | Human |
| MW510564 | Singapore | 2016 | Lineage5 | Human |
| MW510565 | Singapore | 2016 | Lineage5 | Human |
| MW510566 | Singapore | 2016 | Lineage5 | Human |
| MW510567 | Singapore | 2016 | Lineage5 | Human |
| MW510568 | Singapore | 2016 | Lineage5 | Human |
| MW510569 | Singapore | 2016 | Lineage5 | Human |
| MW510570 | Singapore | 2016 | Lineage5 | Human |
| MW510571 | Singapore | 2016 | Lineage5 | Human |
| MW510572 | Singapore | 2016 | Lineage5 | Human |
| MW510573 | Singapore | 2016 | Lineage5 | Human |
| MW510574 | Singapore | 2016 | Lineage5 | Human |
| MW510575 | Singapore | 2016 | Lineage5 | Human |
| MW510576 | Singapore | 2016 | Lineage5 | Human |
| MW510577 | Singapore | 2016 | Lineage5 | Human |
| MW510578 | Singapore | 2016 | Lineage5 | Human |
| MW510579 | Singapore | 2016 | Lineage5 | Human |
| MW510580 | Singapore | 2016 | Lineage5 | Human |
| MW510581 | Singapore | 2016 | Lineage5 | Human |
| MW510582 | Singapore | 2016 | Lineage5 | Human |
| MW510583 | Singapore | 2016 | Lineage5 | Human |

|          |           |      |          |       |
|----------|-----------|------|----------|-------|
| MW510584 | Singapore | 2016 | Lineage5 | Human |
| MW510585 | Singapore | 2016 | Lineage5 | Human |
| MW510586 | Singapore | 2016 | Lineage5 | Human |
| MW510587 | Singapore | 2016 | Lineage5 | Human |
| MW510588 | Singapore | 2016 | Lineage5 | Human |
| MW510589 | Singapore | 2016 | Lineage5 | Human |
| MW510590 | Singapore | 2016 | Lineage5 | Human |
| MW510591 | Singapore | 2016 | Lineage5 | Human |
| MW510592 | Singapore | 2016 | Lineage5 | Human |
| MW510593 | Singapore | 2016 | Lineage5 | Human |
| MW510594 | Singapore | 2016 | Lineage5 | Human |
| MW510595 | Singapore | 2016 | Lineage5 | Human |
| MW510596 | Singapore | 2016 | Lineage5 | Human |
| MW510597 | Singapore | 2016 | Lineage5 | Human |
| MW510598 | Singapore | 2016 | Lineage5 | Human |
| MW510599 | Singapore | 2016 | Lineage5 | Human |
| MW510600 | Singapore | 2016 | Lineage5 | Human |
| MW510601 | Singapore | 2016 | Lineage5 | Human |
| MW510602 | Singapore | 2016 | Lineage5 | Human |
| MW510603 | Singapore | 2016 | Lineage5 | Human |
| MW510604 | Singapore | 2016 | Lineage5 | Human |
| MW510605 | Singapore | 2016 | Lineage5 | Human |
| MW510606 | Singapore | 2016 | Lineage5 | Human |

|          |           |      |          |       |
|----------|-----------|------|----------|-------|
| MW510607 | Singapore | 2016 | Lineage5 | Human |
| MW510608 | Singapore | 2016 | Lineage5 | Human |
| MW510609 | Singapore | 2016 | Lineage5 | Human |
| MW510610 | Singapore | 2016 | Lineage5 | Human |
| MW510611 | Singapore | 2016 | Lineage5 | Human |
| MW510612 | Singapore | 2016 | Lineage5 | Human |
| MW510613 | Singapore | 2016 | Lineage5 | Human |
| MW510614 | Singapore | 2016 | Lineage5 | Human |
| MW510615 | Singapore | 2016 | Lineage5 | Human |
| MW510616 | Singapore | 2016 | Lineage5 | Human |
| MW510617 | Singapore | 2016 | Lineage5 | Human |
| MW510618 | Singapore | 2016 | Lineage5 | Human |
| MW510619 | Singapore | 2016 | Lineage5 | Human |
| MW510620 | Singapore | 2016 | Lineage5 | Human |
| MW510621 | Singapore | 2016 | Lineage5 | Human |
| MW510622 | Singapore | 2016 | Lineage5 | Human |
| MW510623 | Singapore | 2016 | Lineage5 | Human |
| MW510624 | Singapore | 2016 | Lineage5 | Human |
| MW510625 | Singapore | 2016 | Lineage5 | Human |
| MW510626 | Singapore | 2016 | Lineage5 | Human |
| MW510627 | Singapore | 2016 | Lineage5 | Human |
| MW510628 | Singapore | 2016 | Lineage5 | Human |
| MW510629 | Singapore | 2016 | Lineage5 | Human |

|          |           |      |          |       |
|----------|-----------|------|----------|-------|
| MW510630 | Singapore | 2016 | Lineage5 | Human |
| MW510631 | Singapore | 2016 | Lineage5 | Human |
| MW510632 | Singapore | 2016 | Lineage5 | Human |
| MW510633 | Singapore | 2016 | Lineage5 | Human |
| MW510634 | Singapore | 2016 | Lineage5 | Human |
| MW510635 | Singapore | 2016 | Lineage5 | Human |
| MW510636 | Singapore | 2016 | Lineage5 | Human |
| MW510637 | Singapore | 2016 | Lineage5 | Human |
| MW510638 | Singapore | 2016 | Lineage5 | Human |
| MW510639 | Singapore | 2016 | Lineage5 | Human |
| MW510640 | Singapore | 2016 | Lineage5 | Human |
| MW510641 | Singapore | 2016 | Lineage5 | Human |
| MW510642 | Singapore | 2016 | Lineage5 | Human |
| MW510643 | Singapore | 2016 | Lineage5 | Human |
| MW510644 | Singapore | 2016 | Lineage5 | Human |
| MW510645 | Singapore | 2016 | Lineage5 | Human |
| MW510646 | Singapore | 2016 | Lineage5 | Human |
| MW510647 | Singapore | 2016 | Lineage5 | Human |
| MW510648 | Singapore | 2016 | Lineage5 | Human |
| MW510649 | Singapore | 2016 | Lineage5 | Human |
| MW510650 | Singapore | 2016 | Lineage5 | Human |
| MW510651 | Singapore | 2016 | Lineage5 | Human |
| MW510652 | Singapore | 2016 | Lineage5 | Human |

|          |           |      |          |       |
|----------|-----------|------|----------|-------|
| MW510653 | Singapore | 2016 | Lineage5 | Human |
| MW510654 | Singapore | 2016 | Lineage5 | Human |
| MW510655 | Singapore | 2016 | Lineage5 | Human |
| MW510656 | Singapore | 2016 | Lineage5 | Human |
| MW510657 | Singapore | 2016 | Lineage5 | Human |
| MW510658 | Singapore | 2016 | Lineage5 | Human |
| MW510659 | Singapore | 2016 | Lineage5 | Human |
| MW510660 | Singapore | 2016 | Lineage5 | Human |
| MW510661 | Singapore | 2016 | Lineage5 | Human |
| MW510662 | Singapore | 2016 | Lineage5 | Human |
| MW510663 | Singapore | 2016 | Lineage5 | Human |
| MW510664 | Singapore | 2016 | Lineage5 | Human |
| MW510665 | Singapore | 2016 | Lineage5 | Human |
| MW510666 | Singapore | 2016 | Lineage5 | Human |
| MW510667 | Singapore | 2016 | Lineage5 | Human |
| MW510668 | Singapore | 2016 | Lineage5 | Human |
| MW510669 | Singapore | 2016 | Lineage5 | Human |
| MW510670 | Singapore | 2016 | Lineage5 | Human |
| MW510671 | Singapore | 2016 | Lineage5 | Human |
| MW510672 | Singapore | 2016 | Lineage5 | Human |
| MW510673 | Singapore | 2016 | Lineage5 | Human |
| MW510674 | Singapore | 2016 | Lineage5 | Human |
| MW510675 | Singapore | 2016 | Lineage5 | Human |



|          |           |      |          |       |
|----------|-----------|------|----------|-------|
| MW510676 | Singapore | 2016 | Lineage5 | Human |
| MW510677 | Singapore | 2016 | Lineage5 | Human |
| MW510678 | Singapore | 2016 | Lineage5 | Human |
| MW510679 | Singapore | 2016 | Lineage5 | Human |
| MW510680 | Singapore | 2016 | Lineage5 | Human |
| MW510681 | Singapore | 2016 | Lineage5 | Human |
| MW510682 | Singapore | 2016 | Lineage5 | Human |
| MW510683 | Singapore | 2016 | Lineage5 | Human |
| MW510684 | Singapore | 2016 | Lineage5 | Human |
| MW510685 | Singapore | 2016 | Lineage5 | Human |
| MW510686 | Singapore | 2016 | Lineage5 | Human |
| MW510687 | Singapore | 2016 | Lineage5 | Human |
| MW510688 | Singapore | 2016 | Lineage5 | Human |
| MW510689 | Singapore | 2016 | Lineage5 | Human |
| MW510690 | Singapore | 2016 | Lineage5 | Human |
| MW510691 | Singapore | 2016 | Lineage5 | Human |
| MW510692 | Singapore | 2016 | Lineage5 | Human |
| MW510693 | Singapore | 2016 | Lineage5 | Human |
| MW510694 | Singapore | 2016 | Lineage5 | Human |
| MW510695 | Singapore | 2016 | Lineage5 | Human |
| MW510696 | Singapore | 2016 | Lineage5 | Human |
| MW510697 | Singapore | 2016 | Lineage5 | Human |
| MW510698 | Singapore | 2016 | Lineage5 | Human |

|          |           |      |          |       |
|----------|-----------|------|----------|-------|
| MW510699 | Singapore | 2016 | Lineage5 | Human |
| MW510700 | Singapore | 2016 | Lineage5 | Human |
| MW510701 | Singapore | 2016 | Lineage5 | Human |
| MW510702 | Singapore | 2016 | Lineage5 | Human |
| MW510703 | Singapore | 2016 | Lineage5 | Human |
| MW510704 | Singapore | 2016 | Lineage5 | Human |
| MW510705 | Singapore | 2016 | Lineage5 | Human |
| MW510706 | Singapore | 2016 | Lineage5 | Human |
| MW510707 | Singapore | 2016 | Lineage5 | Human |
| MW510708 | Singapore | 2016 | Lineage5 | Human |
| MW510709 | Singapore | 2016 | Lineage5 | Human |
| MW510710 | Singapore | 2016 | Lineage5 | Human |
| MW510711 | Singapore | 2016 | Lineage5 | Human |
| MW510712 | Singapore | 2016 | Lineage5 | Human |
| MW510713 | Singapore | 2016 | Lineage5 | Human |
| MW510714 | Singapore | 2017 | Lineage5 | Human |
| MW510715 | Singapore | 2017 | Lineage5 | Human |
| MW510716 | Singapore | 2017 | Lineage5 | Human |
| MW510717 | Singapore | 2017 | Lineage5 | Human |
| MW510718 | Singapore | 2017 | Lineage5 | Human |
| MW510719 | Singapore | 2017 | Lineage5 | Human |
| MW510720 | Singapore | 2017 | Lineage5 | Human |
| MW512341 | Singapore | 2004 | Lineage5 | Human |

|          |           |      |          |       |
|----------|-----------|------|----------|-------|
| MW512365 | Singapore | 2011 | Lineage5 | Human |
| MW512366 | Singapore | 2011 | Lineage5 | Human |
| MW512367 | Singapore | 2011 | Lineage5 | Human |
| MW512368 | Singapore | 2011 | Lineage5 | Human |
| MW512387 | Singapore | 2013 | Lineage5 | Human |
| MW512388 | Singapore | 2013 | Lineage5 | Human |
| MW512389 | Singapore | 2013 | Lineage5 | Human |
| MW512390 | Singapore | 2013 | Lineage5 | Human |
| MW512392 | Singapore | 2013 | Lineage5 | Human |
| MW512393 | Singapore | 2013 | Lineage5 | Human |
| MW512394 | Singapore | 2013 | Lineage5 | Human |
| MW512395 | Singapore | 2013 | Lineage5 | Human |
| MW512396 | Singapore | 2013 | Lineage5 | Human |
| MW512397 | Singapore | 2013 | Lineage5 | Human |
| MW512398 | Singapore | 2013 | Lineage5 | Human |
| MW512399 | Singapore | 2013 | Lineage5 | Human |
| MW512400 | Singapore | 2013 | Lineage5 | Human |
| MW512401 | Singapore | 2013 | Lineage5 | Human |
| MW512402 | Singapore | 2013 | Lineage5 | Human |
| MW512403 | Singapore | 2013 | Lineage5 | Human |
| MW512416 | Singapore | 2014 | Lineage5 | Human |
| MW512417 | Singapore | 2014 | Lineage5 | Human |
| MW512418 | Singapore | 2014 | Lineage5 | Human |

|          |           |      |          |       |
|----------|-----------|------|----------|-------|
| MW512419 | Singapore | 2014 | Lineage5 | Human |
| MW512420 | Singapore | 2014 | Lineage5 | Human |
| MW512421 | Singapore | 2014 | Lineage5 | Human |
| MW512422 | Singapore | 2014 | Lineage5 | Human |
| MW512423 | Singapore | 2014 | Lineage5 | Human |
| MW512424 | Singapore | 2014 | Lineage5 | Human |
| MW512425 | Singapore | 2014 | Lineage5 | Human |
| MW512426 | Singapore | 2014 | Lineage5 | Human |
| MW512427 | Singapore | 2014 | Lineage5 | Human |
| MW512435 | Singapore | 2015 | Lineage5 | Human |
| MW512436 | Singapore | 2015 | Lineage5 | Human |
| MW512437 | Singapore | 2015 | Lineage5 | Human |
| MW512438 | Singapore | 2015 | Lineage5 | Human |
| MW512439 | Singapore | 2015 | Lineage5 | Human |
| MW512440 | Singapore | 2015 | Lineage5 | Human |
| MW512441 | Singapore | 2015 | Lineage5 | Human |
| MW512442 | Singapore | 2015 | Lineage5 | Human |
| MW512443 | Singapore | 2015 | Lineage5 | Human |
| MW512444 | Singapore | 2015 | Lineage5 | Human |
| MW512445 | Singapore | 2015 | Lineage5 | Human |
| MW512446 | Singapore | 2015 | Lineage5 | Human |
| MW512447 | Singapore | 2015 | Lineage5 | Human |
| MW512451 | Singapore | 2016 | Lineage5 | Human |

|          |           |      |          |       |
|----------|-----------|------|----------|-------|
| MW512452 | Singapore | 2016 | Lineage5 | Human |
| MW512453 | Singapore | 2016 | Lineage5 | Human |
| MW512454 | Singapore | 2016 | Lineage5 | Human |
| MW512455 | Singapore | 2016 | Lineage5 | Human |
| MW512456 | Singapore | 2016 | Lineage5 | Human |
| MW512457 | Singapore | 2016 | Lineage5 | Human |
| MW512458 | Singapore | 2016 | Lineage5 | Human |
| MW512459 | Singapore | 2016 | Lineage5 | Human |
| MW512460 | Singapore | 2016 | Lineage5 | Human |
| MW512461 | Singapore | 2016 | Lineage5 | Human |
| MW512462 | Singapore | 2016 | Lineage5 | Human |
| MW512463 | Singapore | 2016 | Lineage5 | Human |
| MW512471 | Singapore | 2017 | Lineage5 | Human |
| MW512472 | Singapore | 2017 | Lineage5 | Human |
| MW512473 | Singapore | 2017 | Lineage5 | Human |
| MW512474 | Singapore | 2017 | Lineage5 | Human |
| MW512475 | Singapore | 2017 | Lineage5 | Human |
| MW512476 | Singapore | 2017 | Lineage5 | Human |
| MW512477 | Singapore | 2017 | Lineage5 | Human |
| MW512478 | Singapore | 2017 | Lineage5 | Human |
| MW512481 | Singapore | 2018 | Lineage5 | Human |
| MW512482 | Singapore | 2018 | Lineage5 | Human |
| MW512483 | Singapore | 2018 | Lineage5 | Human |

|          |           |      |                         |          |
|----------|-----------|------|-------------------------|----------|
| MW512484 | Singapore | 2018 | Lineage5                | Human    |
| MW512485 | Singapore | 2018 | Lineage5                | Human    |
| MW512486 | Singapore | 2018 | Lineage5                | Human    |
| MW512487 | Singapore | 2018 | Lineage5                | Human    |
| MW512488 | Singapore | 2018 | Lineage5                | Human    |
| MW512491 | Singapore | 2019 | Lineage5                | Human    |
| MW512492 | Singapore | 2019 | Lineage5                | Human    |
| MW512493 | Singapore | 2019 | Lineage5                | Human    |
| MW512494 | Singapore | 2019 | Lineage5                | Human    |
| MW512495 | Singapore | 2019 | Lineage5                | Human    |
| MW512496 | Singapore | 2019 | Lineage5                | Human    |
| MW512497 | Singapore | 2019 | Lineage5                | Human    |
| MW512498 | Singapore | 2019 | Lineage5                | Human    |
| MW510037 | Singapore | 2018 | Lineage5                | Mosquito |
| MW510038 | Singapore | 2018 | Lineage5                | Mosquito |
| MW510117 | Singapore | 2017 | Lineage5                | Mosquito |
| MW510118 | Singapore | 2017 | Lineage5                | Mosquito |
| MW510120 | Singapore | 2017 | Lineage5                | Mosquito |
| MW510992 | Singapore | 2015 | Unclassified (Outgroup) | Human    |
| MW510993 | Singapore | 2015 | Unclassified (Outgroup) | Human    |
| MW510989 | Singapore | 2012 | Unclassified (Outgroup) | Human    |
| MW510988 | Singapore | 2011 | Unclassified (Outgroup) | Human    |
| MW510991 | Singapore | 2015 | Unclassified (Outgroup) | Human    |

|          |           |      |                         |       |
|----------|-----------|------|-------------------------|-------|
| MW510994 | Singapore | 2016 | Unclassified (Outgroup) | Human |
| MW510990 | Singapore | 2014 | Unclassified (Outgroup) | Human |

**Supplementary Table S2: Oligonucleotides used for the amplification and sequencing of DENV-2 genomes**

| Fragment   | Primer name | Sequence (5' - 3')        |
|------------|-------------|---------------------------|
| Fragment 1 | Den2 16F*   | TGGACCGACAAAGACAGATTCTTTG |
|            | Den2 348F   | CAGGAAAGAGATTGGAAGGATGC   |
|            | Den2 738F   | AATGGGACTGGAGACACGAACTG   |
|            | Den2 934R   | TCATTGAAGGAGCGACAGC       |
|            | Den2 1169R* | CCTTGTGTTGGGCAGCGAGAT     |
| Fragment 2 | Den2 771F*  | ACATGGATGTCRTCAGAAGG      |
|            | Den2 1353F  | GTGATAACACCTCACTCAGGG     |
|            | Den2 1596R  | CCATGGTAACGGCAGGTC        |
|            | Den2 2540R* | GAAGGGGATTCTGGTTGG        |
| Fragment 3 | Den2 2146F* | ACAACAATGAGAGGAGCGAAGAG   |
|            | Den2 2796F  | CACAGAACTTCATAACCACACCT   |
|            | Den2 3222R  | GGGCCTGCCGTTTGTGTATGAT    |
|            | Den2 3865R  | CTAAAGCCAACGCGTCAGTCAGT   |
|            | Den2 3545F  | TCAGGACCCGAGTAGGAACGAA    |
|            | Den2 4590R* | ATAGGCTCCATCTTCCAGTTCAG   |
| Fragment 4 | Den2 4158F* | GGCAGTCGGGATGGTGAGC       |
|            | Den2 4539F  | TGTCCCTTCACCCCCACCTGT     |
|            | Den2 4590R  | ATAGGCTCCATCTTCCAGTTCAG   |

|            |              |                         |
|------------|--------------|-------------------------|
|            | Den2 4773R   | CTTCCAGCCTCCTCCATACGATA |
|            | Den2 5403R   | TATGCTTGCTGGGTCTGTGAAAT |
|            | Den2 5784R*  | CCTCTCGGCCTTGAAGTTAGCAC |
| Fragment 5 | Den2 5443F*  | GAAGCAGCTGGGATTTTTATGAC |
|            | Den2 6072R   | GTCCACCTTTTCACGCTCTG    |
|            | Den2 6359F   | TCGCAGCTGGAAGAAAGTC     |
|            | Den2 6776R   | AATTGGTTATCTTGGGGTGTTT  |
|            | Den2 7161R   | GAGAAGGGCTGCTGTGAGAGTTA |
|            | Den2 7733R*  | ACAGCGTGATGGTCCGTTTCT   |
| Fragment 6 | Den2 7416F*  | AACCGGGCCCATCTCTACTG    |
|            | Den2 7926F   | CGGTTGGAATCTGGTGCGTCTT  |
|            | Den2 8181R   | AGCTCCTCCGTATTTCCTTTGT  |
|            | Den2 8327F   | AGCCAGATGTTGACCTCGGAAGT |
|            | Den2 8847R   | AACAGCCTCACGTGCCGACTT   |
|            | Den2 9154R*  | CTCCTCCTTCTTTCTTACTCACG |
| Fragment 7 | Den2 8662F*  | GAACCGAAAGAAGGCACGAAAAA |
|            | Den2 9599R   | GCGCTTGCAAACCTGTCATCTAA |
|            | Den2 8967F   | CAAAGCAAAAGGCAGCAGAGC   |
|            | Den2 9821F   | CAGCCTGTTTGGGGAAGTCT    |
|            | Den2 10321R* | GGCTTAATCCGACCTGACTTCTG |

Amplification primers are denoted by asterisks. The remaining primers, together with amplification primers were used for sequencing.

### Amplification protocol

|                                         |
|-----------------------------------------|
| <b>PCR conditions - Fragments 1 - 7</b> |
|-----------------------------------------|



| Temperature °C              | Time     | Cycle |
|-----------------------------|----------|-------|
| 98 °C                       | 10 sec   | 1     |
| 98 °C                       | 5 sec    | 35    |
| 62 °C (F2 & F6)             | 10 sec   |       |
| 65 °C (F1, F3, F4, F5 & F7) |          |       |
| 72 °C                       | 45 sec   |       |
| 72 °C                       | 2 min    | 1     |
| 20 °C                       | infinity | 1     |

Each fragment was PCR amplified by using 0.5  $\mu$ M of fragment-specific primers and 1X Phusion™ Flash High-Fidelity PCR Master Mix (Thermo Fisher Scientific, MA, USA).

**Supplementary Table S3: List of countries and the number of *E* gene sequences of each genotype of DENV-2 used in the analyses**

| Country Name   | latitude | longitude | Number of sequences |
|----------------|----------|-----------|---------------------|
| American Samoa | -14.2756 | -170.702  | 10                  |
| Australia      | -35.3438 | 149.083   | 26                  |
| Bangladesh     | 23.77718 | 90.39945  | 12                  |
| Bhutan         | 26.87056 | 90.48556  | 2                   |
| Borneo         | 1.0343   | 114.33    | 2                   |
| Brunei         | 4.94029  | 114.9481  | 3                   |
| Burkina Faso   | 12.36566 | -1.53388  | 6                   |

|                  |          |          |       |
|------------------|----------|----------|-------|
| China            | 39.91382 | 116.3636 | 518   |
| Ireland          | 53.35014 | -6.26615 | 2     |
| Ivory Coast      | 5.345317 | -4.02443 | 1     |
| Fiji             | -17.7134 | 178.065  | 14    |
| France           | 48.86472 | 2.349014 | 1     |
| French Polynesia | -16.7613 | -151.444 | 12    |
| Ghana            | 7.952771 | -1.03071 | 1     |
| Guam             | 13.4443  | 144.7937 | 1     |
| India            | 28.4512  | 77.1646  | 137   |
| Indonesia        | -6.21462 | 106.8451 | 267   |
| Japan            | 35.65283 | 139.8395 | 3     |
| Kenya            | -1.28042 | 36.81631 | 21    |
| Maldives         | 1.924992 | 73.39966 | 3     |
| Malaysia         | 3.140853 | 101.6932 | 180   |
| Micronesia       | 6.887481 | 158.2151 | 3     |
| New Caledonia    | -21.2107 | 165.8517 | 13    |
| Palau            | 7.51498  | 134.5825 | 1     |
| Pakistan         | 33.73805 | 73.08449 | 52    |
| Papua New Guinea | -6.47838 | 145.2417 | 25    |
| Philippines      | 14.59951 | 120.9842 | 138   |
| Saudi Arabia     | 24.77427 | 46.73859 | 11    |
| Singapore        | 1.29027  | 103.852  | 1,691 |
| Solomon Islands  | -9.42635 | 160.1874 | 1     |

|             |          |          |    |
|-------------|----------|----------|----|
| Somalia     | 2.046934 | 45.31816 | 5  |
| South Korea | 37.53260 | 127.0246 | 3  |
| Sri Lanka   | 6.927079 | 79.86124 | 13 |
| Taiwan      | 25.1055  | 121.5974 | 73 |
| Tanzania    | -6.16118 | 35.74543 | 3  |
| Thailand    | 13.73672 | 100.5232 | 19 |
| Timor Leste | -8.55686 | 125.5603 | 48 |
| Tuvalu      | -8.52115 | 179.1962 | 4  |
| Uganda      | 0.347596 | 32.58252 | 1  |
| Vietnam     | 10.76262 | 106.6602 | 36 |
| Wallis      | 29.63414 | -96.0639 | 5  |

**Supplementary Table S4: Unique amino acid signature of Indian sub-continent lineage as compared to other lineages of cosmopolitan genotype and other non-sylvatic genotypes of DENV-2**

| Polyprotein position | Gene | Gene position | REF <sup>¶</sup> | Other genotypes | Indian lineage | Cosmo lineages (Excluding Indian lineage) |
|----------------------|------|---------------|------------------|-----------------|----------------|-------------------------------------------|
| 112                  | C    | 112           | V                | V/A             | A (97%)        | V (100%)                                  |
| 143                  | preM | 29            | D                | D               | D (100%)       | N (100%)                                  |

|      |      |     |   |     |          |          |
|------|------|-----|---|-----|----------|----------|
| 332  | E    | 52  | Q | Q/E | Q (100%) | H (97%)  |
| 906  | NS1  | 131 | Q | Q   | Q (100%) | H (98%)  |
| 1190 | NS2A | 63  | T | T   | A (97%)  | T (97%)  |
| 1260 | NS2A | 133 | V | V/A | I (96%)  | V (98%)  |
| 1342 | NS2A | 215 | S | S   | N (99%)  | S (99%)  |
| 1408 | NS2B | 63  | D | D   | D (100%) | E (98%)  |
| 1548 | NS3  | 73  | K | K   | R (97%)  | K (100%) |
| 1748 | NS3  | 273 | V | V   | V (100%) | I (98%)  |
| 1936 | NS3  | 461 | I | I   | I (98%)  | V (97%)  |
| 2487 | NS4B | 244 | T | T   | T (95%)  | A (100%) |
| 2589 | NS5  | 98  | R | R   | R (98%)  | K (98%)  |
| 3096 | NS5  | 605 | G | G   | G (100%) | V (98%)  |
| 3107 | NS5  | 616 | E | E   | G (98%)  | E (100%) |
| 3136 | NS5  | 645 | N | N   | D (96%)  | N (100%) |

<sup>†</sup>REF=NCBI refseq accession number NC\_001474.2

### Supplementary Figures

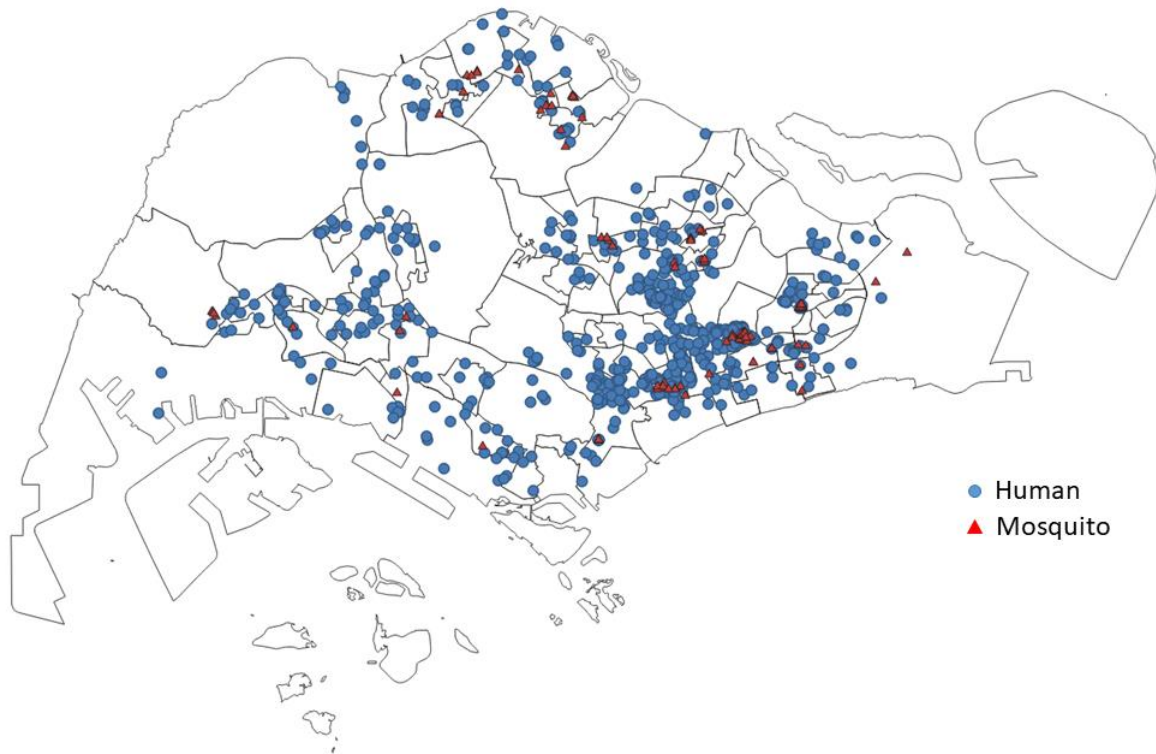

**Supplementary Figure S1. Distribution of newly generated sequences obtained from human sera and field-caught mosquitoes.** The map was generated by using the QGIS 3.16 open source ([www.qgis.org](http://www.qgis.org)) software and the layer obtained from the OneMap open source portal ([www.datascoutonemap.com](http://www.datascoutonemap.com)). Each sequence was mapped based on the postal codes of locations where respective human cases were detected and mosquitoes were captured.

**Supplementary Figure S2. Bayesian phylogeny of DENV-2 complete coding sequences.** This is an expansion view of Figure 3. The maximum clade credibility (MCC) tree was constructed in BEAST 1.10.4 version, using general time reversible (GTR) substitution model, relaxed random clock model and Bayesian skyline prior. The analysis included 380 complete coding sequences of the cosmopolitan genotype and a relatively small reference dataset to represent Asian I (n=10),

Asian II (n=10), Asian-American (n=8), American (n=8) and sylvatic (n=3) genotypes. Each genotype is colour coded as shown in the legend. The numbers at the nodes represent the posterior probability values. The time scale (in years) and scale bar (substitutions/site/year) are given at the bottom of the figure.

**Supplementary Figure S3. Phylogenetic analysis of *E* gene sequences of cosmopolitan**

**genotype.** This is an expansion view of Figure 4. The neighbour joining tree was constructed by using 3,367 complete *E* gene sequences. The alignment included 2,319 sequences retrieved from NCBI database and 1,048 sequences generated during the present study. The taxa names of newly generated sequences are colour coded; those obtained from human sera in light blue and those derived from mosquitoes in red. Distinct lineages are shown in different colours. Sequences that were not classified into any distinct lineage are shown in black branches.
