# Supplementary material for: Evolution, heterogeneity and global dispersal of cosmopolitan genotype of Dengue virus type 2
Source: PubMed Central journal article supplement (PMC8241877; doi:10.1038/s41598-021-92783-y), 2021-06-29
Supplement: 41598_2021_92783_MOESM3_ESM.pdf [file 41598_2021_92783_MOESM3_ESM.pdf]

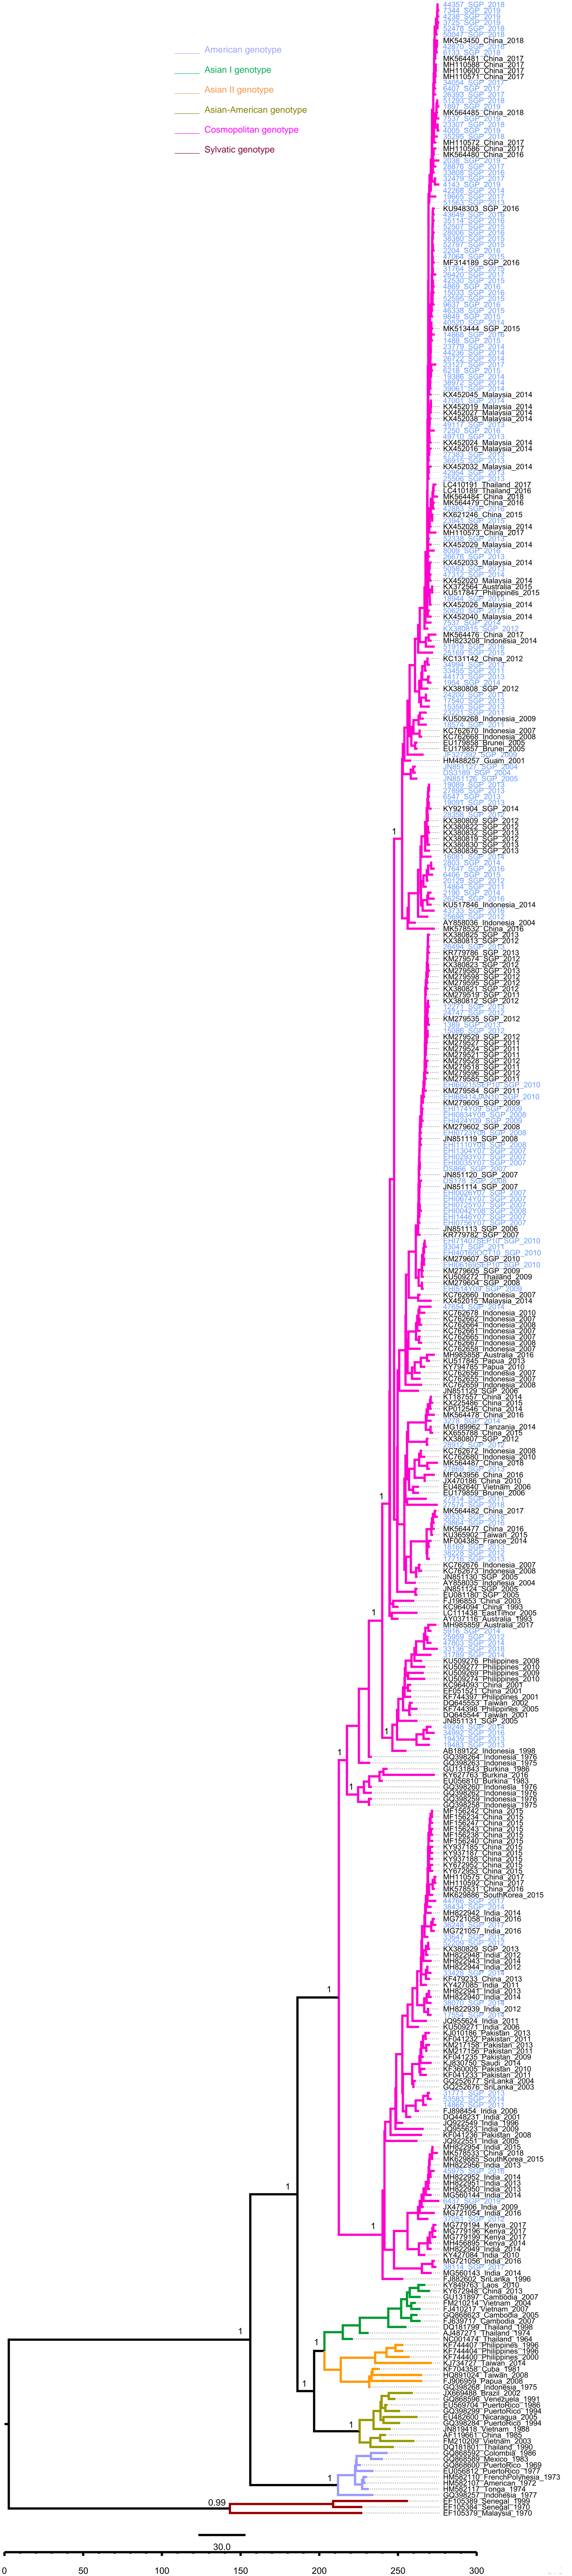

- American genotype
- Asian I genotype
- Asian II genotype
- Asian-American genotype
- Cosmopolitan genotype
- Sylvatic genotype

7344 SGP 2019  
 4238 SGP 2018  
 52478 SGP 2018  
 50047 SGP 2018  
 MK543450\_China\_2018  
 63870 SGP 2018  
 MK564481\_China\_2017  
 MH110588\_China\_2017  
 MH110590\_China\_2017  
 MH110571\_China\_2017  
 34054 SGP 2018  
 6407 SGP 2017  
 26393 SGP 2017  
 26393 SGP 2017  
 1897 SGP 2019  
 1897 SGP 2019  
 MK564485\_China\_2018  
 7537 SGP 2019  
 4009 SGP 2019  
 35295 SGP 2018  
 35295 SGP 2018  
 MH110572\_China\_2017  
 MH110586\_China\_2017  
 MK564480\_China\_2016  
 28876 SGP 2017  
 33808 SGP 2016  
 4143 SGP 2019  
 4143 SGP 2019  
 42268 SGP 2014  
 19685 SGP 2017  
 65197 SGP 2017  
 KU948303\_SGP\_2016  
 41649 SGP 2015  
 35114 SGP 2018  
 52507 SGP 2018  
 52507 SGP 2018  
 38380 SGP 2015  
 52797 SGP 2015  
 2204 SGP 2016  
 47664 SGP 2015  
 MF314189\_SGP\_2016  
 31784 SGP 2015  
 26420 SGP 2017  
 42530 SGP 2015  
 42530 SGP 2015  
 15033 SGP 2016  
 52595 SGP 2015  
 52595 SGP 2015  
 96338 SGP 2016  
 46338 SGP 2015  
 9849 SGP 2015  
 40520 SGP 2014  
 40520 SGP 2014  
 MK513444\_SGP\_2015  
 14888 SGP 2015  
 14888 SGP 2015  
 23779 SGP 2014  
 44236 SGP 2014  
 44236 SGP 2014  
 26722 SGP 2014  
 6218 SGP 2015  
 6218 SGP 2015  
 19386 SGP 2014  
 38972 SGP 2014  
 38972 SGP 2014  
 47011 SGP 2014  
 KX452045\_Malaysia\_2014  
 KX452019\_Malaysia\_2014  
 KX452027\_Malaysia\_2014  
 KX452038\_Malaysia\_2014  
 7250 SGP 2016  
 4045 SGP 2013  
 KX452024\_Malaysia\_2014  
 KX452016\_Malaysia\_2014  
 21883 SGP 2013  
 36815 SGP 2013  
 36815 SGP 2013  
 25506 SGP 2013  
 25506 SGP 2013  
 LC410191\_Thailand\_2017  
 LC410189\_Thailand\_2016  
 MK564484\_China\_2012  
 MK564479\_China\_2016  
 4688 SGP 2016  
 4688 SGP 2016  
 KX621246\_China\_2015  
 KX452028\_Malaysia\_2014  
 MH110573\_China\_2017  
 KX452029\_Malaysia\_2014  
 9687 SGP 2013  
 9687 SGP 2013  
 KX452033\_Malaysia\_2014  
 50583 SGP 2013  
 50583 SGP 2013  
 KX452020\_Malaysia\_2014  
 KX372564\_Australia\_2015  
 KU517847\_Philippines\_2015  
 KX452026\_Malaysia\_2014  
 50583 SGP 2013  
 KX452040\_Malaysia\_2014  
 7538 SGP 2014  
 7538 SGP 2014  
 MK564476\_China\_2017  
 MH823208\_Indonesia\_2014  
 51918 SGP 2018  
 51918 SGP 2018  
 KC131142\_China\_2012  
 33455 SGP 2011  
 44173 SGP 2013  
 44173 SGP 2013  
 KX380808\_SGP\_2012  
 24200 SGP 2012  
 17540 SGP 2013  
 15356 SGP 2013  
 15356 SGP 2013  
 KU509268\_Indonesia\_2009  
 16774 SGP 2011  
 16774 SGP 2011  
 KC762670\_Indonesia\_2007  
 KC762668\_Indonesia\_2008  
 EU179858\_Brunei\_2005  
 EU179857\_Brunei\_2005  
 HM488257\_Guam\_2001  
 18311 SGP 2009  
 DS3189\_SGP\_2004  
 JN851126\_SGP\_2005  
 19089 SGP 2013  
 19089 SGP 2013  
 6547 SGP 2013  
 19091 SGP 2013  
 19091 SGP 2013  
 KY921904\_SGP\_2014  
 17540 SGP 2013  
 17540 SGP 2013  
 KX380822\_SGP\_2012  
 KX380832\_SGP\_2013  
 KX380830\_SGP\_2013  
 KX380836\_SGP\_2013  
 16081 SGP 2014  
 16081 SGP 2014  
 2603 SGP 2016  
 17603 SGP 2016  
 6406 SGP 2015  
 20129 SGP 2012  
 14864 SGP 2011  
 14864 SGP 2011  
 26254 SGP 2016  
 26254 SGP 2016  
 KU517846\_Indonesia\_2014  
 43733 SGP 2018  
 26333 SGP 2018  
 AY858036\_Indonesia\_2004  
 MK578532\_China\_2016  
 KX380825\_SGP\_2013  
 KX380813\_SGP\_2012  
 33455 SGP 2011  
 KR779786\_SGP\_2013  
 KM279574\_SGP\_2012  
 KX380823\_SGP\_2012  
 KM279580\_SGP\_2013  
 KM279584\_SGP\_2012  
 KM279585\_SGP\_2012  
 KM279518\_SGP\_2011  
 KM279596\_SGP\_2012  
 KM279585\_SGP\_2012  
 KM279584\_SGP\_2011  
 KM279609\_SGP\_2009  
 EHI6847A\_SGP\_2010  
 EHI6847A\_SGP\_2010  
 EHI0834Y08\_SGP\_2008  
 EHI424Y09\_SGP\_2009  
 KM279602\_SGP\_2008  
 EHI0724Y08\_SGP\_2008  
 JN851119\_SGP\_2008  
 EHI1110Y08\_SGP\_2008  
 EHI1304Y07\_SGP\_2007  
 EHI0035Y07\_SGP\_2007  
 EHI0035Y07\_SGP\_2007  
 DS866\_SGP\_2007  
 JN851120\_SGP\_2007  
 DS866\_SGP\_2007  
 JN851114\_SGP\_2007  
 EHI0026Y07\_SGP\_2007  
 EHI0674Y07\_SGP\_2007  
 EHI0725Y07\_SGP\_2007  
 EHI004Y09\_SGP\_2009  
 EHI1446Y08\_SGP\_2008  
 EHI0756Y07\_SGP\_2007  
 JN851113\_SGP\_2006  
 KR779782\_SGP\_2007  
 EHI0724Y08\_SGP\_2008  
 93047 SGP 2011  
 EHI4016OCT10\_SGP\_2010  
 KM279607\_SGP\_2010  
 EHI0724Y08\_SGP\_2008  
 KM279605\_SGP\_2009  
 KU509272\_Thailand\_2009  
 KM279604\_SGP\_2008  
 EHI0724Y08\_SGP\_2008  
 KC762660\_Indonesia\_2007  
 KX452015\_Malaysia\_2014  
 47654 SGP 2014  
 KC762678\_Indonesia\_2010  
 KC762667\_Indonesia\_2007  
 KC762664\_Indonesia\_2008  
 KC762661\_Indonesia\_2007  
 KC762665\_Indonesia\_2007  
 KC762667\_Indonesia\_2007  
 KC762667\_Indonesia\_2007  
 MH985858\_Australia\_2016  
 KU517845\_Papua\_2013  
 KY794785\_Papua\_2010  
 KC762659\_Indonesia\_2007  
 KC762655\_Indonesia\_2007  
 KC762659\_Indonesia\_2008  
 JN851129\_SGP\_2006  
 KT18157\_China\_2014  
 KP22586\_China\_2015  
 KP012546\_China\_2014  
 MK564478\_China\_2016  
 31784 SGP 2015  
 MG189962\_Tanzania\_2014  
 KX655788\_China\_2015  
 KX380807\_SGP\_2012  
 KC762672\_Indonesia\_2008  
 KC762680\_Indonesia\_2010  
 MK564487\_China\_2018  
 34992 SGP 2018  
 34992 SGP 2018  
 MF043956\_China\_2016  
 JX470186\_China\_2010  
 EU482640\_Vietnam\_2006  
 EU179859\_Brunei\_2006  
 47914 SGP 2018  
 47914 SGP 2018  
 MK564482\_China\_2017  
 30583 SGP 2018  
 30583 SGP 2018  
 MK564477\_China\_2016  
 KU365902\_Taiwan\_2015  
 MF004385\_France\_2014  
 18169 SGP 2013  
 39228 SGP 2013  
 39228 SGP 2013  
 KC762676\_Indonesia\_2007  
 KC762673\_Indonesia\_2008  
 JN851130\_SGP\_2005  
 AY858035\_Indonesia\_2004  
 JN851124\_SGP\_2005  
 EU081180\_SGP\_2005  
 FJ196853\_China\_2003  
 KC964094\_China\_1998  
 LC111438\_EastTimor\_2005  
 AY037116\_Australia\_1993  
 MH985859\_Australia\_2017  
 5916 SGP 2014  
 5916 SGP 2014  
 47803 SGP 2014  
 33136 SGP 2018  
 33136 SGP 2018  
 KU509276\_Philippines\_2008  
 KU509277\_Philippines\_2010  
 KU509269\_Philippines\_2009  
 KU509274\_Philippines\_2010  
 KC964093\_China\_2001  
 FJ051521\_China\_2001  
 KF744397\_Philippines\_2001  
 DO645553\_Taiwan\_2002  
 KF744398\_Philippines\_2005  
 DO645544\_Taiwan\_2001  
 JN851131\_SGP\_2005  
 49248 SGP 2013  
 49248 SGP 2013  
 34992 SGP 2018  
 19439 SGP 2013  
 19439 SGP 2013  
 AB189122\_Indonesia\_1998  
 GO398264\_Indonesia\_1976  
 GO398263\_Indonesia\_1975  
 GU11843\_Burkina\_1986  
 KY627763\_Burkina\_2016  
 EU056810\_Burkina\_1983  
 GO398260\_Indonesia\_1976  
 GO398262\_Indonesia\_1976  
 GO398258\_Indonesia\_1975  
 MF156242\_China\_2015  
 MF156234\_China\_2015  
 MF156247\_China\_2015  
 MF156243\_China\_2015  
 MF156238\_China\_2015  
 MF156240\_China\_2015  
 KY937185\_China\_2012  
 KY937188\_China\_2015  
 KY672952\_China\_2015  
 KY672953\_China\_2015  
 MH110575\_China\_2017  
 MH110592\_China\_2017  
 MK578531\_China\_2016  
 MK629886\_SouthKorea\_2015  
 34992 SGP 2018  
 34992 SGP 2018  
 MH822942\_India\_2014  
 MG721058\_India\_2016  
 39228 SGP 2013  
 39228 SGP 2013  
 MG721057\_India\_2016  
 52209 SGP 2012  
 52209 SGP 2012  
 KX380829\_SGP\_2013  
 MH822948\_India\_2012  
 MH822943\_India\_2014  
 MH822944\_India\_2012  
 34992 SGP 2018  
 KF479239\_China\_2013  
 KY427085\_India\_2011  
 MH822941\_India\_2013  
 MH822940\_India\_2014  
 34992 SGP 2018  
 MH822939\_India\_2012  
 MH822947\_India\_2013  
 JQ955624\_India\_2011  
 KU509271\_India\_2006  
 KU1010186\_Pakistan\_2013  
 KF041232\_Pakistan\_2011  
 KM217158\_Pakistan\_2013  
 KM217156\_Pakistan\_2011  
 KF041235\_Pakistan\_2009  
 J830740\_Saudi\_2014  
 KF360005\_Pakistan\_2010  
 KF041233\_Pakistan\_2011  
 GO252676\_SriLanka\_2004  
 GO252676\_SriLanka\_2004  
 53583 SGP 2014  
 53583 SGP 2014  
 FJ196854\_India\_2006  
 DO448231\_India\_2001  
 JQ922549\_India\_1996  
 JQ955623\_India\_2009  
 KF041236\_Pakistan\_2008  
 JQ922531\_India\_2005  
 MH822954\_India\_2015  
 MK578533\_China\_2016  
 MK629885\_SouthKorea\_2015  
 MH822956\_India\_2013  
 34992 SGP 2018  
 34992 SGP 2018  
 MH822952\_India\_2014  
 MH822951\_India\_2013  
 MH822950\_India\_2013  
 MG660144\_India\_2014  
 64583 SGP 2014  
 64583 SGP 2014  
 JX475906\_India\_2009  
 MG721054\_India\_2016  
 34992 SGP 2018  
 34992 SGP 2018  
 MG779194\_Kenya\_2017  
 MG779196\_Kenya\_2017  
 MG779199\_Kenya\_2017  
 MH456835\_Kenya\_2014  
 MH822949\_India\_2014  
 KY427084\_India\_2010  
 MG721056\_India\_2016  
 34992 SGP 2018  
 34992 SGP 2018  
 MG560143\_India\_2014  
 FJ882602\_SriLanka\_1996  
 KY849763\_Laos\_2010  
 KY672948\_China\_2013  
 GU191799\_Cambodia\_2007  
 FM210214\_Vietnam\_2004  
 FJ410217\_Vietnam\_2007  
 GO868623\_Cambodia\_2005  
 FJ639717\_Cambodia\_2007  
 DQ181799\_Thailand\_1998  
 AJ487271\_Thailand\_1974  
 NC001474\_Thailand\_1964  
 KF744407\_Philippines\_1996  
 KF744400\_Philippines\_1996  
 KF744400\_Philippines\_1996  
 KJ734727\_Taiwan\_2014  
 KF704358\_Cuba\_1981  
 HO90924\_Taiwan\_2008  
 FJ06939\_Papua\_2008  
 GO398268\_Indonesia\_1975  
 JX669488\_Brazil\_2002  
 GO868596\_Venezuela\_1991  
 EU560704\_PuertoRico\_1996  
 GO398269\_PuertoRico\_1994  
 EU482600\_Nicaragua\_2005  
 GO398284\_PuertoRico\_1994  
 JN819418\_Vietnam\_1988  
 AF119661\_China\_1985  
 FM210209\_Vietnam\_2003  
 DQ181801\_Thailand\_1990  
 GO868592\_Columbia\_1986  
 GO868589\_Mexico\_1983  
 GO868600\_PuertoRico\_1969  
 EU056812\_PuertoRico\_1977  
 HM582110\_FrenchPolynesia\_1973  
 HM582117\_America\_1972  
 HM582117\_America\_1972  
 GO398257\_Indonesia\_1977  
 EF105389\_Senegal\_1999  
 EF105384\_Senegal\_1970  
 EF105379\_Malaysia\_1970

30.0

0 50 100 150 200 250 300
